1 **The lethal triad: SARS-CoV-2 Spike, ACE2 and TMPRSS2. Mutations in host**  
2 **and pathogen may affect the course of pandemic**

3 **Short title:** SARS-CoV-2 Spike variants, and ACE2 and TMPRSS2 polymorphisms

4 **Matteo Calcagnile<sup>1</sup>, Patricia Forgez<sup>2</sup>, Marco Alifano<sup>3\*#</sup>, Pietro Alifano<sup>1\*#</sup>**

5

6

7 <sup>1</sup>Department of Biological and Environmental Sciences and Technologies, University of Salento,  
8 Lecce, Italy.

9 <sup>2</sup>INSERM UMR-S 1124 T3S, Eq 5 CELLULAR HOMEOSTASIS, CANCER and THERAPY,  
10 University of Paris, Campus Saint Germain, Paris, France.

11 <sup>3</sup>Thoracic Surgery Department, Cochin Hospital, APHP Centre, University of Paris, France;  
12 INSERM U1138 Team «Cancer, Immune Control, and Escape», Cordeliers Research Center,  
13 University of Paris, France.

14

15 #These authors contributed equally to the work

16 \*To whom correspondence should be addressed:

17 Pietro Alifano: Department of Biological and Environmental Sciences and Technologies, University  
18 of Salento, Lecce, Italy; e-mail: [pietro.alifano@unisalento.it](mailto:pietro.alifano@unisalento.it)

19 Marco Alifano: Thoracic Surgery Department, AP-HP, University of Paris, France; e-mail:  
20 [marco.alifano@aphp.fr](mailto:marco.alifano@aphp.fr)

21

22

23

24 **Abstract**

25 Variants of SARS-CoV-2 have been identified rapidly after the beginning of pandemic. One of them,  
26 involving the spike protein and called D614G, represents a substantial percentage of currently isolated  
27 strains. While research on this variant was ongoing worldwide, on December 20<sup>th</sup> 2020 the European  
28 Centre for Disease Prevention and Control reported a Threat Assessment Brief describing the  
29 emergence of a new variant of SARS-CoV-2, named B.1.1.7, harboring multiple mutations mostly  
30 affecting the Spike protein. This viral variant has been recently associated with a rapid increase in  
31 COVID-19 cases in South East England, with alarming implications for future virus transmission  
32 rates. Specifically, of the nine amino acid replacements that characterize the Spike in the emerging  
33 variant, four are found in the region between the Fusion Peptide and the RBD domain (namely the  
34 already known D614G, together with A570D, P681H, T716I), and one, N501Y, is found in the Spike  
35 Receptor Binding Domain – Receptor Binding Motif (RBD-RBM). In this study, by using *in silico*  
36 biology, we provide evidence that these amino acid replacements have dramatic effects on the  
37 interactions between SARS-CoV-2 Spike and the host ACE2 receptor or TMPRSS2, the protease that  
38 induces the fusogenic activity of Spike. Mostly, we show that these effects are strongly dependent on  
39 ACE2 and TMPRSS2 polymorphism, suggesting that dynamics of pandemics are strongly influenced  
40 not only by virus variation but also by host genetic background.

41  
42 **Keywords:** COVID-19; SARS-CoV-2 Spike protein; ACE2 polymorphism; TMPRSS2  
43 polymorphism; SARS-CoV-2 Spike protein variants; *In silico* modeling

44  
45  
46  
47  
48  
49

## 50 **Introduction**

51 Viruses, like all other species, obey evolutionary and biodiversity rules. According to these rules,  
52 surviving viruses adapt to their own benefit. To prevent these adaptations, there are two human  
53 interventions possible, either eradicate the virus, or attempt to understand the relationship between  
54 the host and the virus, to mitigate the effects of the virus.

55 The severe acute respiratory syndrome corona virus -2 (SARS-CoV-2) spread incredibly  
56 quickly between people, due to its newness and transmission route, but the kinetics of diffusion and  
57 mortality remains variable from one country to another. A multitude of factors may concur to explain  
58 the ethnic and geographical differences in pandemic progression and severity. Considerable  
59 individual differences in susceptibility to onset of disease caused by SARS-CoV-2 may be involved,  
60 including mainly sex, age and underlying conditions [1]. However, genomic predisposition, a major  
61 concept in modern medicine, prompts to understand molecular bases of heterogeneity in diffusion  
62 and severity of disease, to find prevention and treatment strategies. If host genomic predisposition  
63 has been advocated since the beginning of pandemic, virus' genomic predisposition (i.e. the  
64 occurrence of mutations) to spread less or more easily and eventually to cause more or less severe  
65 disease has been initially unkempt, because of capacity of Coronaviruses to proofread, thus removing  
66 mismatched nucleotides during genome replication and transcription. However, in the last few  
67 months it begun evident that some specific mutants (see below) are progressively superseding the  
68 virus that was identified as wild type, rising enormous questions in terms of comprehension of  
69 mechanisms of pathogen-host interaction.

70 SARS-CoV-2 uses envelope Spike projections as a key to enter human airway cells [2] through a  
71 specific receptor. Spike glycoproteins form homotrimers protruding from the viral surface, and  
72 comprise two major functional domains: an N-terminal domain (S1) for binding to the host cell  
73 receptor, and a C-terminal domain (S2) that is responsible for fusion of the viral and cellular  
74 membranes [3]. Following the interaction with the host receptor, internalization of viral particles is  
75 accomplished thanks to the activation of fusogenic activity of Spike, as a consequence of major

76 conformational changes that are triggered by receptor binding, low pH exposure and proteolytic  
77 activation [3]. Spike glycoproteins are cleaved by furin at the boundary between S1 and S2 domains,  
78 and the resulting S1 and S2 subunits remain non-covalently bound in the prefusion conformation with  
79 important consequences on fusogenicity [3]. Notably, at variance with SARS-CoV and other SARS-  
80 like CoV Spike glycoproteins, SARS-CoV-2 Spike glycoprotein contain a furin cleavage site at the  
81 S1/S2 boundary, which is cleaved during viral biogenesis [4], and may affect the major entry route  
82 of viruses into the host cell [3].

83 Proteases from the respiratory tract such as those belonging to the transmembrane protease/serine  
84 subfamily (TMPRSS), TMPRSS2 or HAT (TMPRSS11d) are able to induce SARS-CoV Spike  
85 glycoprotein fusogenic activity [5-8]. The first cleavage at the S1-S2 boundary (R667) facilitates the  
86 second cleavage at position R797 releasing the fusogenic S2' sub-domain<sup>5</sup>. On the other hand, there  
87 is also evidence that cleavage of the ACE2 C-terminal segment by TMPRSS2 can enhance Spike  
88 glycoprotein-driven viral entry [9]. Notably, it has been demonstrated that SARS-CoV-2 cell entry is  
89 blocked by specific protease inhibitors [10].

90 SARS-CoV-2 and respiratory syndrome corona virus (SARS-CoV) Spike proteins share very  
91 high phylogenetic similarities (99%), and both viruses exploit the same human cell receptor namely  
92 angiotensin-converting enzyme 2 (ACE2), a transmembrane enzyme whose expression dominates on  
93 lung alveolar epithelial cells [4,11,12]. This receptor is an 805-amino acid long captopril-insensitive  
94 carboxypeptidase with a 17-amino acids N-terminal signal peptide and a C-terminal membrane  
95 anchor. It catalyzes the cleavage of angiotensin I into angiotensin 1-9, and of angiotensin II into the  
96 vasodilator angiotensin 1-7, thus playing a key role in systemic blood pressure homeostasis,  
97 counterbalancing the vasoconstrictive action of angiotensin II, which is generated by cleavage of  
98 angiotensin I catalyzed by ACE<sup>17</sup> Although ACE2 mRNA is expressed ubiquitously, ACE2 protein  
99 expression dominates on lung alveolar epithelial cells, enterocytes, arterial and venous endothelial  
100 cells, and arterial smooth muscle cells [13].

101 There is evidence that ACE2 may serve as a chaperone for membrane trafficking of an amino

102 acid transporter B0AT1 (also known as SLC6A19), which mediates the uptake of neutral amino acids  
103 into intestinal cells in a sodium dependent manner [14]. Recently, 2.9 Å resolution cryo-EM structure  
104 of full-length human ACE2 in complex with B0AT1 was presented, and structural modelling suggests  
105 that the ACE2-B0AT1 can bind two Spike glycoproteins simultaneously [15,16]. It has been  
106 hypothesized that the presence of B0AT1 may block the access of TMPRSS2 to the cutting site on  
107 ACE2 [15,16]. B0AT1 (also known as SLC6A19) is expressed with high variability in normal human  
108 lung tissues, as shown by analysis of data available in Oncomine from the work by Weiss et al [17].

109 Notably, a wide range of genetic polymorphic variation characterizes the ACE2 gene, which maps  
110 on the X chromosome, and some polymorphisms have been significantly associated with the  
111 occurrence of arterial hypertension, diabetes mellitus, cerebral stroke, septal wall thickness,  
112 ventricular hypertrophy, and coronary artery disease [18-20]. The association between ACE2  
113 polymorphisms and blood pressure responses to the cold pressor test led to the hypothesis that the  
114 different polymorphism distribution worldwide may be the consequence of genetic adaptation to  
115 different climatic conditions[20,21]. *In silico* tools identified ACE2 single-nucleotide polymorphisms  
116 (SNPs) responsible for increased or decreased ACE2/Spike affinity, suggesting that ACE2  
117 polymorphism can contribute to ethnic and geographical differences in SARS COVID-19 spreading  
118 across the world. While these results need biological confirmation, it has become urgent that a more  
119 precise assessment of the interplay between SARS CoV-2 Spike ACE2 and TMPRSS should be  
120 evaluated taking into account polymorphisms of these two proteins along with the genetic evolution  
121 of the virus. In the context of the present pandemic, *In silico* studies provide a rapid means to evaluate  
122 the interaction between molecules and gives direction for further biological and clinical studies.

123 Two Spike mutations lead the current scientific debate: D614G and N501Y, the former identified  
124 as soon as January 2020, and currently accounting for the majority of isolated strains in several  
125 countries, the latter isolated from clinical samples in England and Wales in the last few days and  
126 responsible for an “uncontrolled” diffusion of the virus. Although these mutations affect different  
127 regions of the Spike (directly the Receptor Binding Domain for N501Y, and the region close to the

128 TMPRSS proteolytic site the D614G), both are likely to affect structure and function of the protein,  
129 and, as a consequence the effectiveness of the whole process of entry of the virus, though in a different  
130 manner. To elucidate initial steps of host-pathogen interactions taking into account both Spike and  
131 human polymorphisms (of both ACE2 and TMPRSS), we studied geographical distribution of the  
132 D614G variant and its evolution over time, and modeled, by *in silico* tools, on one hand D614G Spike  
133 /TMPRSS2 interaction, and, on the other one, N501Y Spike/ACE2 interaction.

134

135

136

## 137 **Results**

### 138 **The emerging variant of SARS-CoV-2 Spike with multiple amino acid changes, and** 139 **geographical distribution of the single amino acid changes as inferred from databases**

140 On December 20<sup>th</sup> 2020 the European Centre for Disease Prevention and Control reported a Threat  
141 Assessment Brief describing the emergence of a new variant of SARS-CoV-2, named B.1.1.7,  
142 harboring multiple mutations mostly affecting the Spike protein (Fig. 1A) (European Centre for  
143 Disease Prevention and Control, 2020) [22]. This variant has been recently associated with a rapid  
144 increase in COVID-19 cases in South East England, and its spread worries all governments around  
145 the world. Seven mutations are found in this variant: the mutation N501Y is found in the Spike  
146 Receptor Binding Domain – Receptor Binding Motif (RBD-RBM) and it was predicted to increase  
147 substantially the affinity of Spike for ACE2 [23], four, A570D, D614G, P681H, T716I, are found in  
148 the region between the Fusion Peptide and the RBD domain, two, S982A and D1118Y, are located,  
149 respectively, in the Heptad Repeat region 1 (HR1) and HR1-Heptad Repeat region 2 (HR2), while  
150 two small deletions, i.e. deletion 69-70 and deletion 144, affect the N-terminal region of the Spike  
151 protein (Fig. 1AB). Here we focused on the possible effects of some of these amino acid replacements  
152 on the interactions between Spike and ACE2 or TMPRSS2, and examined the possible effects of  
153 ACE2 and TMPRSS2 polymorphisms on these interactions.

154 On June 2020 the frequencies of the individual amino acid substitutions (N501Y, A570D, D614G,  
155 P681H, T716I, S982A, D1118Y) in COVID-19 clinical samples were quite low except the frequency  
156 of the D614G that was already high suggesting that the punctual mutation D614G represented already  
157 a selective advantage for the virus [24,25] (Table 1). Figure 1C illustrates the relative distribution of  
158 annotated SARS-CoV-2 Spike mutations with respect to each protein domain as inferred from [24]  
159 (Dataset S1), and [25] (Dataset S2), and also shows the results of this analysis with SARS-CoV Spike  
160 mutations [26,27] (Dataset S3). Spike protein variants encompassing 7 domains (N-terminal,  
161 receptor-binding domain (RBD), fusion peptide, HR1, HR2, trans-membrane domain and inner  
162 domain), and 3 inter-domain regions (RBD-fusion peptide, fusion peptide-HR1 and HR1-HR2) were

163 analyzed. The data show that most common variants of the SARS-CoV-2 Spike are located in a  
164 protein region that spans the amino acids 541 and 788, while in SARS-CoV Spike the corresponding  
165 region between amino acids 14 and 305 was primarily affected by amino acid variation, followed by  
166 the region 541-788 (Fig. 1C). The region 541-788 links the RBD and the fusion peptide and contains  
167 the S1/S2 cleavage site for TMPRSS2, the trans-membrane protease that has been shown to carry out  
168 the priming of the SARS-CoV-2 Spike by sequential cleavage at S1/S2 and S2' (Fig. 1C) [10,28].

169 The Dataset S1 was used to determine the geographical distribution and temporal spread of the  
170 SARS-CoV-2 Spike D614G, the most diffused variant. The data show distinct patterns in the different  
171 geographical regions. Specifically, in Eastern Asia the D614G variant was described in January 2020  
172 at low frequency (3.8%) and then it was subject to a decremental trend over time (Fig. S1). A similar  
173 trend can be also observed in Central Asia, where the variant was reported in March 2020. In contrast,  
174 an incremental trend can be noted in South Eastern Asia with a maximal occurrence approaching 30%  
175 in June 2020. The D614G variant reached the highest occurrences in Northern Western Europe (50%  
176 in April 2020), Central Europe (18% in February 2020), Southern Europe (10% in February 2020),  
177 and Northern America (26% in March 2020) with distinct temporal patterns but a persistence trend  
178 in the population. Much lower frequencies can be observed in Eastern Europe and Russia, Southern  
179 America and in Africa, with an incremental trend in Eastern Europe and Africa. The geographical  
180 distribution, the different occurrence and temporal spread of the SARS-CoV-2 Spike protein D614G  
181 variant worldwide raises the question of whether genetic differences of the host may be involved.

182

183

184

185

186



187 **Table 1.** Frequencies of SARS-CoV-2 Spike amino acid substitutions detected in COVID-19 clinical  
 188 samples.

| Amino acid substitution | Position | Domain             | Number of detected allele in the database <sup>a</sup> | Relative frequency of allele (%) |
|-------------------------|----------|--------------------|--------------------------------------------------------|----------------------------------|
| N501Y                   | 501      | RBD-RBM            | 1                                                      | 0.00%                            |
| A570V                   | 570      | Fusion Peptide-RBD | 13                                                     | 0.04%                            |
| A570S                   | 570      | Fusion Peptide-RBD | 3                                                      | 0.01%                            |
| A570T                   | 570      | Fusion Peptide-RBD | 1                                                      | 0.00%                            |
| A570D                   | 570      | Fusion Peptide-RBD | 1                                                      | 0.00%                            |
| D614G                   | 614      | Fusion Peptide-RBD | 26408                                                  | 82.24%                           |
| D614N                   | 614      | Fusion Peptide-RBD | 4                                                      | 0.01%                            |
| P681L                   | 681      | Fusion Peptide-RBD | 20                                                     | 0.06%                            |
| P681S                   | 681      | Fusion Peptide-RBD | 4                                                      | 0.01%                            |
| P681H                   | 681      | Fusion Peptide-RBD | 3                                                      | 0.01%                            |
| T716I                   | 716      | Fusion Peptide-RBD | 14                                                     | 0.04%                            |
| S982A                   | 982      | HR1                | 0                                                      | 0.00%                            |
| D1118Y                  | 1118     | HR2-HR1            | 2                                                      | 0.01%                            |

189 The database was constructed from the data in Rhaman et al., 2020 [24].

190

191 **Effects of D614G on SARS-CoV-2 Spike protein structure as inferred by *in silico* modeling**

192 *In silico* simulations were performed to investigate the possible effects of the D614G substitution on  
 193 SARS-CoV-2 Spike protein folding and flexibility. Secondary structures of the region spanning the  
 194 amino acids 601-627 in the wild type and the D614G variant of SARS-CoV-2 Spike protein were  
 195 predicted by using the *ab initio* method on PEPfold server [29,30]. The results demonstrated that in  
 196 the wild type (D614) SARS-CoV-2 Spike this region forms an N-terminal  $\alpha$ -helix followed by a C-  
 197 terminal  $\beta$ -sheet (Fig. 2A). D614G replacement was predicted to drastically change the peptide  
 198 secondary structure by replacing the C-terminal  $\beta$ -sheet with a  $\alpha$ -helix (Fig. 2A). The effects of the  
 199 D614G substitution on SARS-CoV Spike structure were then analyzed. Unlike the SARS-CoV-2

200 Spike, the corresponding amino acid region (amino acids 587-613) in the wild type SARS-CoV Spike  
201 is arranged in two anti-parallel  $\alpha$ -helices (Fig. 2B), similar to those found in D614G SARS-CoV-2  
202 Spike variant, and the D614G substitution does not seem to change this structure (Fig. 2B).

203 The analysis was then extended to other D614 variants. Results show that in SARS-CoV Spike the  
204 anti-parallel  $\alpha$ -helices are very stable, and do not appear to be affected by any substitution studied  
205 (D614E, D614P, D614A) (Fig. 2B). In contrast, in SARS-CoV-2 Spike D614E and D614P  
206 substitution does not change the N-terminal  $\beta$ -sheet / C-terminal  $\alpha$ -helix structure of the wild type  
207 protein, while in the D614A variant the C-terminal  $\beta$ -sheet is lost (Fig. 2A).

208 CABSflex [31] was used to analyze the possible effects of the D614G substitution on flexibility  
209 of the region spanning the amino acids 601-627 in SARS-CoV-2 and the corresponding region (amino  
210 acids 587-613) in SARS-CoV Spike. CABSflex simulations predicted contrasting effects in SARS-  
211 CoV-2 and SARS-CoV Spike proteins, with an increase in flexibility in the former (Fig. 2C), and a  
212 decrease in flexibility in the other protein (Fig. 2D). CABSflex analysis was also extended to the  
213 other D614 variants, and demonstrated that the increase in flexibility was highest in D614A variant  
214 (Fig. 2C), while confirming the high stability of the corresponding region (amino acids 587-613) in  
215 all SARS-CoV Spike variants (Fig. 2D).

216 Using PEPfold and CABSflex, a comprehensive analysis of all amino acid variations identified in  
217 the emerging B.1.1.7 SARS-CoV-2 variant was performed (Fig. S2). The computational analysis  
218 demonstrated that two amino acid substitutions, T716I and D1118H, (Fig. S2F and S2H) and the  
219 deletion at the residues 144 (Fig. S2B) may locally affect the secondary structures of the Spike protein  
220 causing the transition from  $\beta$ -sheet to coiled-coil structure. In contrast, N501Y, A570D and S982A  
221 substitutions (Fig. S2C, S2D and S2G) and the deletion 69-70 (Fig. S2A) did not appear to disturb  
222 the structures, while P681H (Fig. S2E) was expected to cause a minor change in the secondary  
223 structure conformation. CABSflex analysis predicted that the variations analyzed in this study  
224 generally reduce the flexibility of the Spike (Fig. S2I), particularly those affecting the amino acids  
225 460-490 and 1050-1255. A punctual analysis revealed that the changes in amino acids 501, 716, 982,

226 1118 may contribute to reduce the flexibility of Spike in the B.1.1.7 SARS-CoV-2 variant, while  
227 changes in amino acids 570, 614 and 681 may have an opposite effect (Fig. S2I).

228

229 ***In silico* interaction between TMPRSS2 and wild type or D614G SARS-CoV-2 Spike, and**  
230 **variation with TMPRSS2 polymorphisms**

231 The S1/S2 TMPRSS2 cleavage site was mapped at location 685 in the amino acid sequence of SARS-  
232 CoV-2 Spike protein, close to the aspartic acid residue (D614). This premise led us to explore the  
233 possible effect of the D614G substitution on TMPRSS2 processing of SARS-CoV-2 Spike protein,  
234 and a possible correlation between the geographical distribution / temporal spread of the SARS-CoV-  
235 2 Spike protein D614G variant, and the geographical distribution of TMPRSS2 polymorphisms in  
236 humans. Beside, an analysis of occurrence of residues revealed that the D614G polymorphisms was  
237 registered in both the dataset of SARS-CoV-2 (Dataset S1 and S2), in the of SARS-CoV (Dataset  
238 S3), and in a set of sequences of SARS-like viruses (Fig. S3). Bat SARS-like viruses show acid  
239 residues (D or E), while porcine and bovine SARS-like viruses show a basic residue (N), evidencing  
240 as the acid-apolar (D-G) substitution was an adaptation at the human host.

241 The complete list of TMPRSS2 variants was downloaded from gnomAD v2.1.1 database  
242 (<https://gnomad.broadinstitute.org/>), and the data were analyzed by using the multivariate ordination  
243 method of PAST. NM-MDS was used to visualize TMPRSS2 variant distribution in 7 geographical  
244 regions (African/African American, Latino/Admixed American, European (Finnish), European (non-  
245 Finnish), Ashkenazi Jewish, Southern Asian and Eastern Asian) (Fig. S4A), while PCA was used to  
246 represent the most diffused variants (>0.05% in at least one region) (Fig. S4B, Table 2).

247 Protein variants affect different regions of TMPRSS2 that contain three major functional domains:  
248 an N-terminal domain (amino acids 1-184) comprising a Low-Density Lipoprotein Receptor Class A  
249 domain (cysteine-rich repeat, LDLA, cd00112) (amino acids 150-184), a Scavenger receptor cysteine-  
250 rich domain (SRCR\_2, pfam15494) (amino acids 190-283), and a Trypsin-like serine protease  
251 domain (Tryp\_SPc, cd00190) (amino acids 293-524). Particularly, the N-terminal and the SRCR\_2

252 domains exhibit the higher values of both percentages of missenses in GenomAD (n° of single  
253 missense/ total missenses) and frequencies of variants (Fig. 3A). The most diffused polymorphisms  
254 are G8V and V197M (Fig. 3B; Fig. S4C). V197M is diffused in all geographical regions (frequency  
255 >10%), while G8V is highly diffused in all regions (frequency >10%), excluding Eastern Asia  
256 (frequency <10%).

257 *In silico* molecular docking simulations were carried out on Gramm-X server [32] to predict the  
258 possible the impact of G8V and V197M TMPRSS2 variants on the interaction with either wild type  
259 or D570A, D614G, P681H and T716I SARS-CoV-2 Spike protein variants. The results demonstrated  
260 that all (D570A, D614G, P681H, T716I) substitutions result in a notable increase in the computed  
261 affinity of SARS-CoV-2 Spike protein for wild type TMPRSS2 (Fig. 3C), while a dramatic decrease  
262 in the affinity for G8V TMPRSS2 variant was observed when D614G and T716I Spike protein  
263 variants were used in the simulations (Fig. 3C). In addition, both V197M and G8V TMPRSS2 protein  
264 variants exhibited a very low affinity for D614G SARS-CoV-2 Spike.

265 The docking complexes obtained with wild type TMPRSS2 or G8V variant and wild type SARS-  
266 CoV-2 Spike or D614G variant were visualized by using Chimera (Fig. 4). Chimera enlightened a  
267 serine residue at position 637 of wild type SARS-CoV-2 Spike establishing an H-bond with a  
268 glutamic acid residue at position 60 of wild type TMPRSS2 (Fig. 4A). The H-bond was conserved in  
269 the complexes formed between the wild type Spike and G8V TMPRSS2 (Fig. 4B), and between  
270 D614G Spike and G8V TMPRSS2 (Fig. 4D), while it was absent in the complex formed between  
271 D614G Spike and wild type TMPRSS2 (Fig. 4C). Two additional H-bonds were present in the  
272 complexes formed between either wild type or D614G Spike and G8V TMPRSS2 (Fig. 4B and Fig.  
273 4D, respectively): the first one involving a lysine residue at position 529 of the Spike and a glutamic  
274 acid residue at position 22 of TMPRSS2; the second one involving a phenylalanine residue at position  
275 2 of the Spike and a glutamic acid residue at position 53 of TMPRSS2. These two H-bond were absent  
276 in the complex of D614G Spike and wild type TMPRSS2 (Fig. 4C), which showed a unique  
277 arrangement involving four H-bonds: i.) between a glutamine residue at position 271 of the Spike

278 protein and a glutamine residue at position 66 of TMPRSS2; ii.) between a threonine residue at  
 279 position 236 of the Spike protein and a threonine residue at position 68 of TMPRSS2; iii.) between a  
 280 leucine residue at position 7 of the Spike protein and a serine residue at position 298 of TMPRSS2;  
 281 iv.) between a threonine residue at position 20 of the Spike protein and a serine residue at position  
 282 355 of TMPRSS2. Notably, serine 298 is close to histidine 296 of the TMRSS2 active site pocket  
 283 catalytic triad that also includes aspartic acid 345 and serine 441 [33].

284

285 **Table 2.** Frequencies of TMPRSS2 polymorphisms according GnomAD (frequency>0,05% for  
 286 almost one measure).

| rsID                                        | Missense | AFR <sup>1</sup> | AMR <sup>2</sup> | ASJ <sup>3</sup> | EAS <sup>4</sup> | FIN <sup>5</sup> | NFE <sup>6</sup> | OTH <sup>7</sup> | SAS <sup>8</sup> | Total diffusion |
|---------------------------------------------|----------|------------------|------------------|------------------|------------------|------------------|------------------|------------------|------------------|-----------------|
| rs75603675                                  | G8V      | 32,84%           | 27,60%           | 38,17%           | 1,30%            | 40,76%           | 42,47%           | 37,62%           | 26,88%           | <b>35,06%</b>   |
| rs12329760                                  | V197M    | 29,18%           | 15,33%           | 13,52%           | 38,38%           | 37,25%           | 23,20%           | 23,36%           | 24,77%           | <b>24,88%</b>   |
| rs61735793                                  | T112I    | 0,17%            | 0,30%            | 0,83%            | 0,00%            | 1,11%            | 1,06%            | 0,77%            | 0,41%            | <b>0,73%</b>    |
| rs200291871                                 | G8R      | 0,21%            | 0,30%            | 0,65%            | 0,00%            | 0,24%            | 1,09%            | 0,64%            | 0,04%            | <b>0,59%</b>    |
| rs61735791                                  | A65T     | 0,09%            | 0,10%            | 0,04%            | 0,12%            | 0,02%            | 0,28%            | 0,18%            | 0,05%            | <b>0,17%</b>    |
| rs61735790                                  | H55R     | 0,95%            | 0,06%            | 0,00%            | 0,01%            | 0,00%            | 0,00%            | 0,03%            | 0,00%            | <b>0,09%</b>    |
| rs148125094                                 | V452I    | 0,02%            | 0,03%            | 0,00%            | 0,00%            | 0,16%            | 0,13%            | 0,10%            | 0,07%            | <b>0,09%</b>    |
| rs114363287                                 | G111R    | 0,64%            | 0,01%            | 0,00%            | 0,00%            | 0,00%            | 0,01%            | 0,01%            | 0,00%            | <b>0,06%</b>    |
| rs147711290                                 | L128Q    | 0,63%            | 0,01%            | 0,00%            | 0,00%            | 0,00%            | 0,00%            | 0,00%            | 0,00%            | <b>0,06%</b>    |
| <b>Total diffusion in human populations</b> |          | 66,02%           | 44,24%           | 55,21%           | 41,50%           | 79,89%           | 68,80%           | 63,16%           | 53,10%           |                 |

287

288 <sup>1</sup>AFR=African/African-American; <sup>2</sup>AMR=Latino/Admixed American; <sup>3</sup>ASJ=Ashkenazi Jewish;  
 289 <sup>4</sup>EAS=East Asian; <sup>5</sup>FIN=Finnish; <sup>6</sup>NFE=Non-Finnish European; <sup>7</sup>SAS=South Asian; <sup>8</sup>OTH=Other  
 290 (population not assigned).

291

292 **D614G substitution in the context of the new SARS-CoV-2 Spike variant B.1.1.7**

293 The amino acid substitution N501Y is found in the Spike Receptor Binding Domain – Receptor  
294 Binding Motif (RBD-RBM), and this led us, in a previous work [23], to speculate possible effects on  
295 binding with ACE2. Consistently with previous finding [23], molecular docking simulations by  
296 HDOCK server predicted a substantial increase in computed binding affinity (global energy score)  
297 from -50.26 Kcal/mol (wild type Spike) to -67.49 Kcal/mol (N501Y Spike). In contrast, N501Y was  
298 expected to slightly decrease the affinity for K26R ACE2 variant (from -54.79 Kcal/mol to -52.57)  
299 (Fig. 5A), which is associated with an increased affinity with WT spike [23], suggesting that the  
300 effect of N501Y substitution is dependent on ACE2 genetic background. In fact, the analysis of  
301 molecular docking complexes by Chimera revealed that the number and the arrangement of contacts  
302 and H-bonds were different in the different complexes (Table 3), with a higher contact density in  
303 N501Y Spike RBD / wild type ACE2 complex (Fig. 5B), as compared to the other complexes. Most  
304 of contacts involve the tyrosine 501, as visualized by Chimera (Fig. 5E). Many contacts were lost in  
305 the complex between N501Y Spike RBD and K26R ACE2 variant (Fig. 5D).

306

307 **Table 3.** Total contacts and H-bonds in molecular docking complexes.

| <b>Docking complexes</b>                 | <b>Total contacts</b> | <b>Total H-bonds</b> |
|------------------------------------------|-----------------------|----------------------|
| ACE2 (wild type) / Spike RBD (wild type) | 28                    | 5                    |
| ACE2 (K26R) / Spike RBD (wild type)      | 30                    | 9                    |
| ACE2 (wild type) / Spike RBD (N501Y)     | 36                    | 5                    |
| ACE2 (K26R) / Spike RBD (N501Y)          | 33                    | 9                    |

308

309 Figure 5A also predicts the effects of single Spike RBD-RBM amino acid substitutions, which were  
310 found in other new SARS-CoV-2 Spike variants, namely the 501.V2 variant from South Africa  
311 (K417N and E484K in addition to N501Y), the 20A.EU2 from Europe (S477N), and a new variant  
312 from Italy (harboring N501T). Results demonstrated that all RBD-RBM amino acid substitutions  
313 result in an increase in computed affinity with ACE2, albeit with substantial differences. In particular,  
314 the N501T exhibited slight increase as compared to wild type Spike (from -50.26 to -51.88 Kcal/mol),  
315 and the increase was only moderate with S477N (from -50.26 to -60.01 Kcal/mol) and E484K (from  
316 -50.26 to -57.17 Kcal/mol). Slight effects were observed with N501T and S477N using the K26R  
317 ACE2 variant as a receptor. In contrast, E484K showed a marked reduction in computed affinity with  
318 the K26R ACE2 variant (from -54.79 Kcal/mol to -39.37 Kcal/mol).

319 As the 501.V2 variant from South Africa includes multiple RBD-RBM amino acid substitutions  
320 affecting the Spike RBD-RBM, HDOCK simulations were then performed in the presence of all  
321 substitutions (Fig. 6A). Results predicted that the combined effect of the three amino acid  
322 substitutions N501Y, K417N and E484K was less than that of the single N501Y (Fig. 5A) in terms  
323 of increased computed affinity for ACE2 (from -50.26 to -56.37 Kcal/mol as compared to -67.49  
324 Kcal/mol of N510Y).

325 Similarly, we decided to evaluate the combined effects of the multiple amino acid substitutions of  
326 the SARS-CoV-2 Spike variant B.1.1.7 on computed affinity with TMPRSS2 (Fig. 6B). *De novo*  
327 docking simulations were carried out on Gramm-X server, and molecular docking models were  
328 screened by FireDock to determine the energy score. Surprisingly, the combined effects were now  
329 almost negligible in terms of GES as compared to wild type Spike, while the affinity with either the  
330 G8V or V197 TMPRSS2 variants was apparently increased (from -65.30 to -76.77 Kcal/mol, and  
331 from -55.74 to -76.77 Kcal/mol, respectively). This result would suggest that higher infectivity of the  
332 SARS-CoV-2 B.1.1.7 variant could be mostly due to the N501Y substitution in the Spike RBD-RBM.

333

## 334 Discussion

335 In principle, any new infectious agent that challenges a totally susceptible population with little or no  
336 immunity against it is able to totally infect the population causing pandemics. Pandemics rapidly  
337 spread affecting a large part of people causing plenty of deaths with significant social disruption and  
338 economic loss. However, if we look at the even worst pandemics in the human history we can realize  
339 that ethnic and geographical differences in the susceptibility to disease actually exist, in spite of  
340 transmission routes that are the same for all individuals [34]. Infectious sources are susceptible to  
341 evolution, and selective pressure by host characteristics and measure to control the pandemic may  
342 lead to emergence of more aggressive or indolent strains.

343 Although with limitations and caveats of *in silico* technology, this study tries to address the  
344 question of how some mutations of the Spike protein of SARS-CoV-2 may affect the host-pathogen  
345 interactions, providing interesting insight on factors associated with a different individual  
346 susceptibility to COVID-19. To alleviate these limitations, we used a combination of bioinformatics  
347 tools, and tested different models.

348 One year after the spread of the SARS COVID-19, its worldwide distribution remains extremely  
349 uneven. Lethality is even more inhomogeneous among and within countries. Although differences in  
350 mortality might have various causes, including access and efficiency of health systems, total number  
351 of people tested, presence and severity of symptoms in tested populations, they are so impressive that  
352 it seems legitimate to search for other factors possibly related to individuals as the elements of a  
353 population challenged with different types (wild type or mutants) of viruses. Ultimately, infectivity  
354 and lethality do not seem linearly related, and probably represent problems to be solved with different,  
355 albeit complementary, approaches.

356 Basic aspects of epidemiology of the disease warrant some considerations: women are probably  
357 more prone to infection but often present a less severe disease. Although higher incidence of cardiac,  
358 respiratory and metabolic co-morbidities are probably responsible for more severe form of infection  
359 in men, estrogen-induced upregulation of ACE2 expression would explain increased susceptibility of  
360 women to a less severe and often asymptomatic form of disease. Furthermore, the ACE2 gene is



361 located on Xp22, in an area where genes are reported to escape from X-inactivation, further  
362 explaining higher expression in females [35,36].

363 ACE2 plays an essential role in the renin-angiotensin-aldosterone system, and its loss of function  
364 due to the massive binding of viral particles and internalization could constitute an essential element  
365 of the pathophysiology of pulmonary and cardiac damage during COVID-19 infection [37,38]. In this  
366 context it should be underlined that ACE2 probably plays a dual role in the dynamic of infection and  
367 disease course. While at beginning ACE2 overexpression may increase the entry of the virus into the  
368 cell and its replication, its consequent viral-induced loss of function results in an unopposed  
369 accumulation of angiotensin II that further aggravates the acute lung injury response to viral infection.  
370 Indeed, in the rodent blockade of the renin-angiotensin-aldosterone system limits the acute lung injury  
371 induced by the SARS-CoV-1 Spike protein [39], suggesting that if ACE2 function is preserved  
372 (because of increased baseline expression, as especially seen in pre-menopausal women), clinical  
373 course of infection might be less severe.

374 Amount of ACE2 (whose expression is modulated by different factors, including age and different  
375 medical conditions) is only one aspect of the question: it seems clear that the affinity of the virus  
376 Spike for ACE2 is a key determinant of its infective potential. In order to choose the experimental  
377 model capable of reproducing the essential aspects of human infection, Chan and colleagues [40]  
378 determined *in silico* the Spike / ACE2 affinity in primates and in a series of experimental animals,  
379 observing that the binding energy is maximal in primates (-62.20 Rosetta energy units (REU)),  
380 intermediate in Syrian hamster (-49.96 REU), lower in bat (-39.60 REU). This allowed the authors to  
381 predict that hamsters could be infected, which was experimentally confirmed –underlining the  
382 reliability of *in silico* modeling- and could be subsequently at the origin of inter-animal transmission.  
383 Of note, in the same study, Chan and colleagues [40] showed that the binding energy between ACE2  
384 and Spike of SARS-CoV, responsible for the 2002 epidemic, was -39.49 REU as compared to -58.18  
385 of human ACE2. It has been suggested that polymorphisms in the ACE2 gene could reduce or  
386 enhance the wild type Spike affinity with ACE2: *in silico* models have predicted that two non-

387 infrequent polymorphisms -the S19P (0.3% of African populations) and K26R (0.5% of Europeans)-  
388 are associated with decreased or increased affinity and their distribution among patients with COVID-  
389 19 infection is currently being investigated.

390 In the present study, we confirmed our previous theoretical hypothesis that N501Y mutation of  
391 Spike would be associated with an increased ACE2 affinity, and molecular docking clearly shows  
392 that interaction with ACE2 is even better than that of the wild type Spike protein, per se already  
393 remarkable. To date, almost all the cases with this mutation have been described in England and  
394 Wales (SARS-CoV-2 variant, named B.1.1.7), and in South Africa (SARS-CoV-2 variant, named  
395 501.V2). The 501.V2 variant also has K417N and E484K in Spike RBM-RBM, in addition to N501Y.  
396 Speculations on geographical distribution of these variants and, possibly, interaction with differently  
397 distributed ACE2 SNP are not possible. The possible clinical emergence of the N501Y mutation has  
398 been also predicted in a recent work by Gu et al [41]: while developing animal models of infection,  
399 they adapted a clinical isolate of SARS-CoV-2 by serial passaging in the respiratory tract of aged  
400 BALB/c mice. At passage 6 the resulting mouse-adapted strain showed increased infectivity and a  
401 pathology similar to severe human disease (interstitial pneumonia) in both young and aged mice after  
402 intranasal inoculation. Deep sequencing revealed a panel of adaptive mutations, including the N501Y  
403 mutation that is located at the RBD of the Spike protein. By using a different molecular docking  
404 approach, the authors showed an increased ACE2/Spike affinity associated with this mutation. In the  
405 present study, we showed a substantial increase in computed binding affinity with a global energy  
406 score rising from -50.26 Kcal/mol in the wild type Spike to -67.49 Kcal/mol in the N501Y Spike: one  
407 should consider that biological effects are probably much more important than mere physical  
408 variation in global energy score. Of note when measuring the affinity of N501Y Spike for K26R  
409 ACE2 variant (which has a significantly higher affinity for wild type Spike as compared to wild type  
410 ACE2), we observed a decrease in affinity (from -54.79 Kcal/mol to -52.57), suggesting that the  
411 effect of N501Y substitution is dependent on ACE2 genetic background. We provided theoretical  
412 evidence through the analysis of molecular docking complexes by Chimera that the number and the

413 arrangement of contacts and H-bonds were different in the different complexes, with a higher contact  
414 density in N501Y Spike RBD / wild type ACE2 explaining enhanced affinity.

415 In our theoretical approach, the effect of the other leading mutation of Spike, namely D614G, may  
416 occur through interaction with TMPRSS2. This mutation involves a region far from the RBD and *in*  
417 *vitro* studies showed that neutralization by monoclonal antibodies targeting the RBD has equal effects  
418 when either D614 or D614G are challenged. Our models predict that D614G replacement drastically  
419 change the peptide secondary structure by replacing the C-terminal  $\beta$ -sheet with a  $\alpha$ -helix in the  
420 region close to the mutation, and our CABSflex simulations show an increase in flexibility of the  
421 region of interest. Thus, changes in whole protein conformation could results in variations in affinity  
422 between ACE2 and D614G Spike. In the recent work by Yurkovetskiy et al. [42], who also showed  
423 D614G changes in the conformation of the S1 domain in the SARS-CoV-2 S by a cryo-electron  
424 microscopy approach, the association rate between D614G and ACE2 was slower than that between  
425 D614 and ACE2, and the dissociation rate of D614G was faster, resulting in a lower affinity. As the  
426 mutation occurs in the region of the Spike interacting with TMPRSS2, in our approach, we focused  
427 on the possible impact of these possibly modified interactions to explain global changes in  
428 interactions between virus and host machineries. Thus, we observed that D614G change resulted in  
429 a notable increase in the computed affinity of SARS-CoV-2 Spike protein for wild type TMPRSS2.  
430 Chimera modeling enlightened molecular interactions between the wild type or mutant Spike and  
431 TMPRSS2 and showed how changes in H-bond was at the origin of the increase in affinity. We also  
432 modeled the interactions between either D614 or D614G with TMPRSS2, in both its wild type and  
433 polymorphic forms. Of note polymorphisms of TMPRSS2 are frequent, accounting sometimes for 10  
434 percent of populations. These models showed that polymorphic forms of TMPRSS2 are associated  
435 with significant changes in the binding of Spike with either its wild type form or the D614G variant,  
436 providing a possible further explanation for differences in the diffusion rates of the infection.

437 These elements prompt us to conclude that if interactions between wild type Spike, ACE2 and  
438 TMPRSS2 have been identified as the basic mechanism of COVID-19 infection at cellular level,

439 polymorphic variation of not only Spike but also host's protein are likely to be determinant of the  
440 possibility of infection, and, may be, clinical course. Another point of interest is the possible effect  
441 of multiple Spike mutations. This point has to do with the evolution of the virus in the human host.  
442 The D614G is also present in the SARS-CoV-2 variant B.1.1.7, together with additional amino acid  
443 substitutions A570D, P681H, and T716I mapping in the region between the Fusion Peptide and the  
444 RBD domain. Intriguingly, while these single amino acid replacements increases the computed  
445 affinity for wild type TMPRSS2, and results in different affinities for G8V and V197M TMPRSS2  
446 variants depending on specific substitutions, their combination in the B.1.1.7 Spike variant does not  
447 seem to affect substantially the affinity of the mutated Spike for wild type TMPRSS2, while it seems  
448 to increase the affinity for TMPRSS2 variants. This result would suggest, on one hand, that higher  
449 infectivity of the SARS-CoV-2 B.1.1.7 variant could be mostly due to the N501Y substitution in the  
450 Spike RBD-RBM, and, secondly, that the effects of multiple Spike mutations are mostly dependent  
451 on the host genetic background.

452

453

## 454 **Materials and methods**

### 455 **Dataset analysis**

456 Frequencies of SARS-CoV-2 Spike protein variants were previously reported [24,25]. Dataset S1 of  
457 Supplementary material [24] contains more than 32.000 sequences of SARS-CoV-2 Spike; Dataset  
458 S2 of Supplementary material [25] contains the relative frequency of each SARS-CoV-2 Spike  
459 missense. Dataset S3 of Supplementary material includes 29 sequences of SARS-CoV previously  
460 reported [26,27]The functional domains of protein were mapped by CD-search [43] while the trans-  
461 membrane and inner domains were predicted by TMHMM Server v. 2.0. [44] and confirmed by  
462 UniProtKB (ID: P0DTC2 SPIKE\_SARS2). UniProtKB also provides information about  
463 glycosylation and disulfide bond sites. Datasets S1-3 were used to determine the relative distribution  
464 of SARS-CoV and SARS-CoV-2 Spike variants with respect to each protein domain. Datasets S1  
465 was used to assess the geographical distribution and the temporal spread of the SARS-CoV-2 Spike  
466 D614G variant. Dataset S4 of Supplementary material was assembled by using Blast-P [45] searching  
467 for specific taxonomic groups: Avian coronavirus (taxid:694014), SARS-like coronavirus  
468 (taxid:694009), Porcine coronavirus HKU15 (taxid:1159905), Bovine coronavirus (taxid:11128) and  
469 Bat coronavirus (taxid:1508220). NCBI reference sequence of SARS-CoV-2 spike protein was used  
470 as query sequence (YP\_009724390.1). ClustalO mutli-alignment tool [46] was used to identify, in  
471 the Spike proteins of examined coronaviruses, the amino acid residue corresponding to the amino  
472 acid residue 614 of SARS-CoV-2 Spike. GnomAD database v2.1.1 was used to gain information  
473 about the TMPRSS2 polymorphisms, and frequencies in human populations. This set of data was also  
474 analyzed by multivariate methods (NM-MDS and PCA) using PAST [47].

475

### 476 **Structural dynamical feature analyses**

477 Secondary structures of the region spanning the amino acids 601-627 in the SARS-CoV-2 Spike  
478 protein (GTNTSNQVAVLYQDVNCTEVPVAIHAD), and the corresponding region (amino acids  
479 587-613) of SARS-CoV Spike (GTNTSSEVAVLYQDVNCTDVSTAIHAD) was predicted by using

480 the *ab initio* method on PEPfold server [29,30]. The same analysis was performed with SARS-CoV-  
481 2 Spike and SARS-CoV Spike protein variants (D614E, D614G, D614A, D614P in SARS-CoV-2  
482 Spike and the corresponding variants in SARS-CoV Spike). CABSflex [31] was used to analyze the  
483 possible effects of the amino acid substitutions on flexibility of these peptides. All images were  
484 processed and visualized by Chimera USCF [48].

485

### 486 **Molecular docking simulations**

487 The model of isoform 1 of TMPRSS was obtained by using I-Tasser server [49] with the sequence  
488 NP\_001128571.1 as input. The model of the trimeric SARS-CoV-2 Spike was downloaded from  
489 Zhang Laboratory web page (<https://zhanglab.ccmb.med.umich.edu/COVID-19/>). The docking  
490 simulations were carried out on Gramm-X server [32] using the chain A of Spike as a receptor and  
491 TMPRSS2 as a ligand. The molecular docking models were screened by FireDock to determine the  
492 energy score [50,51]. The SSIPe server [52,53] was used to obtain the models of the protein variants  
493 starting with the wild type Spike and TMPRSS2 proteins. These models were re-docked by using  
494 Gramm-X [32]. Using Chimera [49], the obtained complexes were analyzed to select those that show  
495 an interaction between TMPRSS2 and the Spike domain of cleavage sites. The final complexes were  
496 analyzed by using FindHbond and FindClashes/Contacts tools of Chimera in order to identify  
497 contacts, pseudobonds and H-bonds. FindClashes/Contacts is a tool that allows the identification of  
498 interatomic contacts using van der Waals (VDW) radii. This method was used to localize all direct  
499 (polar and nonpolar) interactions between two atoms, including both unfavorable (clashes) and  
500 favorable interactions.

501 In order to compare the Global Energy Scores (GES) in the interaction between wild type or  
502 N501Y Spike RBD with wild type or K26R ACE2 the HDOCK server was used [54]. This tool was  
503 based on a hybrid method: template-base modeling and *ab initio* docking. Template based modeling  
504 was choose as the best strategy to compute the affinity between RBD and ACE2 because many ACE2-  
505 RBD crystallographic models were reported in public database. On the other hand, Gramm-x [32], a

506 tool based on rigid-body docking (Lennard-Jones modified function), was used to identify novel  
507 binding sites. Using the HDOCK server [54], receptors and ligands were submitted as primary amino  
508 acid sequences, including wild type and variant sequences (K26R ACE2 and N501Y RBD). Docking  
509 complexes obtained with the template-base modeling were selected, and the affinity energy was  
510 calculated using FireDock [50,51].

511 The workflow used to perform docking simulations was reported in Fig. S5.

512

513

514 **Conflict of interest**

515 The authors declare no conflict of interest.

516

517 **Authors' contribution**

518 M.C. contributed to experimental set-up, pipeline development, *in silico* analysis; P.F. contributed  
519 to study designing and data providing; M.A. and P.A. contributed to coordination, conception,  
520 designing and writing. M.A. and P.A. contributed equally to the work. All authors critically revised  
521 draft versions of the manuscript and approved the final version.

522

523 **Acknowledgements**

524 The work was partially supported by a grant from “Fondation du Souffle, Cohortes en Pneumologie  
525 2020”

526 The authors are grateful to Dr Niel Insdorf for critical relecture of the paper.

527 **Additional information:** Supplementary Figures and Supplementary Tables can be found in the  
528 Supplementary Material section of the online article.

529

530 **References**

- 531 1. Knight JC. Genomic modulators of the immune response. *Trends Genet.* 2013,29, 74-83. DOI:  
532 10.1016/j.tig.2012.10.006  
533
- 534 2. Chan J FW, Kok KH, Zhu Z, ChuH, To KKW et al. Genomic characterization of the 2019  
535 novel human-pathogenic coronavirus isolated from a patient with atypical pneumonia after  
536 visiting Wuhan. *Emerg Microbes Infect.* 2020, 28, 9, 221-236. DOI :  
537 10.1080/22221751.2020.1719902.  
538
- 539 3. Belouzard S, Millet JK, Licitra BN, Whittaker GR. Mechanisms of coronavirus cell entry  
540 mediated by the viral spike protein. *Viruses.* 2012, 4, 1011-1033. DOI: 10.3390/v4061011.  
541
- 542 4. Walls AC, Park YJ, Tortorici MA, Wall A, McGuire AT, Veessler D. Structure, Function, and  
543 Antigenicity of the SARS-CoV-2 Spike Glycoprotein. *Cell.* 2020,181, 2, 281-292.e6. DOI:  
544 10.1016/j.cell.2020.02.058.  
545
- 546 5. Bertram S, Glowacka I, Müller MA, Lavender H, Gnirss K et al. Cleavage and activation of  
547 the severe acute respiratory syndrome coronavirus spike protein by human airway trypsin-like  
548 protease. *J Virol.* 2011, 85, 13363–13372 (2011). DOI: 10.1128/JVI.05300-11.



549  
550  
551  
552  
553  
554  
555  
556  
557  
558  
559  
560  
561  
562  
563  
564  
565  
566  
567  
568  
569  
570  
571  
572  
573  
574  
575  
576  
577  
578  
579  
580  
581  
582  
583  
584  
585  
586  
587  
588  
589  
590  
591  
592  
593  
594  
595  
596  
597

6. Glowacka I, Bertram S, Müller MA, Allen P, Soilleux E, et al. Evidence that TMPRSS2 activates the severe acute respiratory syndrome coronavirus spike protein for membrane fusion and reduces viral control by the humoral immune response. *J Virol*. 2011, 85, 4122–4134. DOI:10.1128/JVI.02232-10.
7. Kam Y W, Okumura, Y, Kido H, Ng LF, Bruzzone R, Altmeyer R. Cleavage of the SARS coronavirus spike glycoprotein by airway proteases enhances virus entry into human bronchial epithelial cells in vitro. *PLoS One*. 2009, 4,11, e7870. DOI:10.1371/journal.pone.0007870.
8. Shulla A, Heald-Sargent T, Subramanya G, Zhao J, Perlman S, Gallagher T. A transmembrane serine protease is linked to the severe acute respiratory syndrome coronavirus receptor and activates virus entry. *J Virol*. 2011, 85, 873–882. DOI:10.1128/JVI.02062-10.
9. Heurich A, Hofmann-Winkler H, Gierer S, Liepold T, Jahn O, Pöhlmann S. .TMPRSS2 and ADAM17 cleave ACE2 differentially and only proteolysis by TMPRSS2 augments entry driven by the severe acute respiratory syndrome coronavirus spike protein. *J Virol*. 2014, 88, 2, 1293–307. DOI:10.1128/JVI.02202-13.
10. Hoffmann M, Kleine-Weber H, Schroeder S, Krüger N, Herrler T, et al. SARS-CoV-2 Cell Entry Depends on ACE2 and TMPRSS2 and Is Blocked by a Clinically Proven Protease Inhibitor. *Cell*. 2020, 181, 271-280.e8. DOI: 10.1016/j.cell.2020.02.052.
11. Letko M, Marzi A., Munster V. Functional assessment of cell entry and receptor usage for SARS-CoV-2 and other lineage B betacoronaviruses. *Nat Microbiol*. 2020, 5, 562-569. DOI:10.1038/s41564-020-0688-y .
12. Wrapp D, Wang N, Corbett KS, Goldsmith JA, Hsieh C, et al. Cryo-EM structure of the 2019-nCoV spike in the prefusion conformation. *Science*. 2020, 367, 1260-1263. DOI:10.1126/science.abb2507.
13. Hamming I, Timens W, Bulthuis MLC, Lely A.T, Navis G, et al. Tissue distribution of ACE2 protein, the functional receptor for SARS coronavirus. A first step in understanding SARS pathogenesis. *J Pathol*. 2004, 203, 631–637. DOI:10.1002/path.1570.
14. Kowalczyk S, Bröer A, Tietze N, Vanslambrouck JM, Rasko JE, Bröer S. A protein complex in the brush-border membrane explains a Hartnup disorder allele. *FASEB*. 2008, J22, 2880-2887. DOI:10.1096/fj.08-107300.
15. Yan R, Zhang Y, Li Y, Xia L, Zhou Q. Structure of dimeric full-length human ACE2 in complex with B0AT1. *BioRxiv [Preprint]* 2020 [cited 2020 Dec 23] available from: <https://www.biorxiv.org/content/10.1101/2020.02.17.951848v1>. DOI : 10.1101/2020.02.17.951848 21.
16. Yan R, Zhang Y, Li Y, Xia L, Zhou Q. Structural basis for the recognition of SARS-CoV-2 by full-length human ACE2. *Science*. 2020, 367, 6485, 1444-1448. DOI:10.1126/science.abb2762.

- 598 17. Weiss J, Sos ML, Seidel D, Peifer M, Zander T, et al. Frequent and focal FGFR1 amplification  
599 associates with therapeutically tractable FGFR1 dependency in squamous cell lung cancer.  
600 *Sci Transl.* 2010, Med2:62ra93. DOI: 10.1126/scitranslmed.3001451.  
601
- 602 18. Lu N, Yang Y, Wang Y, Liu Y, Fu G, et al. ACE2 gene polymorphism and essential  
603 hypertension: an updated meta-analysis involving 11,051 subjects. *Mol Biol Rep.* 2012, 39,  
604 6, 6581–6589. DOI:10.1007/s11033-012-1487-1. 24.  
605
- 606 19. Pinheiro DS, Santos RS, Jardim PCV, Silva EG, Reis AA, et al. The combination of ACE I/D  
607 and ACE2 G8790A polymorphisms reveals susceptibility to hypertension: A genetic  
608 association study in Brazilian patients. *PLoS ONE.* 2019, 14, e0221248.  
609 DOI:10.1371/journal.pone.0221248.  
610
- 611 20. Zhang Q, Cong M, Wang N, Li X, Zhang H, et al. Association of Angiotensin-Converting  
612 Enzyme 2 gene polymorphism and enzymatic activity with essential hypertension in different  
613 gender: A case-control study. *Medicine (Baltimore).* 2018, 97, 42, e12917. DOI:  
614 10.1097/MD.00000000000012917.  
615
- 616 21. Huang J, Chen S, Lu X, Zhao Q, Rao DC, et al. Polymorphisms of ACE2 are associated with  
617 blood pressure response to cold pressor test: the GenSalt study. *Am J Hypertens.* 2012, 25, 8,  
618 937–942. DOI:10.1038/ajh.2012.61.  
619
- 620 22. European Centre for Disease Prevention and Control. Rapid increase of a SARS-CoV-2  
621 variant with multiple spike protein mutations observed in the United Kingdom – 20 December  
622 2020. ECDC: Stockholm; 2020  
623
- 624 23. Calcagnile M, Forgez P, Iannelli A, Bucci C, Alifano M, Alifano P. Molecular docking  
625 simulation reveals ACE2 polymorphisms that may increase the affinity of ACE2 with the  
626 SARS-CoV-2 Spike protein. *Biochimie.* 2020, 180:143-148. DOI:  
627 10.1016/j.biochi.2020.11.004.  
628
- 629 24. Rahman MS, Islam MR, Hoque MN, Alam ASMRU, Akther M, et al. Comprehensive  
630 annotations of the mutational spectra of SARS-CoV-2 spike protein: a fast and accurate  
631 pipeline. *Transboundary and emerging diseases.* 2020, 00: 1– 14. DOI: 10.1111/tbed.13834  
632
- 633 25. Korber B, Fischer WM, Gnanakaran S, Yoon H, Theiler J, et al. Tracking changes in SARS-  
634 CoV-2 Spike: evidence that D614G increases infectivity of the COVID-19 virus. *Cell.* 2020,  
635 182(4), 812-827. DOI: 10.1016/j.cell.2020.06.043  
636
- 637 26. Xu D, Zhang Z, Chu F, Li Y, Jin L. Genetic variation of SARS coronavirus in Beijing hospital.  
638 *Emerging infectious diseases.* 2004, 10(5), 789. DOI: 10.3201/eid1005.030875  
639
- 640 27. Chinese SARS Molecular Epidemiology Consortium. Molecular evolution of the SARS  
641 coronavirus during the course of the SARS epidemic in China. *Science.* 2004, 303(5664),  
642 1666-1669. DOI: 10.1126/science.1092002  
643
- 644 28. Wang Q, Qiu Y, Li JY, Zhou ZJ, Liao CH, et al. A unique protease cleavage site predicted in  
645 the spike protein of the novel pneumonia coronavirus (2019-nCoV) potentially related to viral  
646 transmissibility. *Virol Sin.* 2020, 35:337–339. DOI:10.1007/s12250-020-00212-7  
647
- 648 29. Maupetit J, Derreumaux P, Tuffery P. PEP-FOLD: an online resource for de novo peptide

- 649 structure prediction. *Nucleic acids research*. 2009, 37(suppl\_2), W498-W503. DOI:  
650 10.1093/nar/gkp323  
651
- 652 30. Shen Y, Maupetit J, Derreumaux P, Tufféry P. Improved PEP-FOLD approach for peptide  
653 and miniprotein structure prediction. *Journal of chemical theory and computation*. 2014,  
654 10(10), 4745-4758. DOI:10.1021/ct500592m  
655
- 656 31. Kuriata A, Gierut AM, Oleniecki T, Ciemny MP, Kolinski A et al. CABS-flex 2.0: a web  
657 server for fast simulations of flexibility of protein structures. *Nucleic acids research*. 2018,  
658 46(W1), W338-W343. DOI:10.1093/nar/gky356  
659
- 660 32. Tovchigrechko A, Vakser IA. GRAMM-X public web server for protein-protein docking.  
661 *Nucleic acids research*. 2006, 34(suppl\_2), W310-W314. DOI:10.1093/nar/gkl206  
662
- 663 33. Stevens BR. TMPRSS2 and ADAM17 interactions with ACE2 complexed with SARS-CoV-  
664 2 and B0AT1 putatively in intestine, cardiomyocytes, and kidney. *BioRxiv [Preprint]*. 2020  
665 [cited 2020 Dec 23]. DOI: 10.1101/2020.10.31.363473  
666
- 667 34. Cohn SK. Pandemics: waves of disease, waves of hate from the Plague of Athens to A.I.D.S.  
668 *Hist J*. 2012, 85, 535-555. DOI:10.1111/j.1468-2281.2012.00603.x  
669
- 670 35. Carrel L, Willard HF. X-inactivation profile reveals extensive variability in X-linked gene  
671 expression in females. *Nature*. 2005, 434, 400-404. DOI:10.1038/nature03479.  
672
- 673 36. Talebizadeh Z, Simon SD, Butler MG. X chromosome gene expression in human tissues:  
674 male and female comparisons. *Genomics*. 2006, 88, 675-681. DOI:  
675 10.1016/j.ygeno.2006.07.016.  
676
- 677 37. Alifano M, Alifano P, Forgez P, Iannelli A. Renin-angiotensin system at the heart of COVID-  
678 19 pandemic. *Biochimie*. 2020,174, 30-33. DOI: 10.1016/j.biochi.2020.04.008.  
679
- 680 38. Gheblawi M, Wang K, Viveiros A, Nguyen Q, Zhong JC, et al. Angiotensin converting  
681 enzyme 2: SARS-CoV-2 receptor and regulator of the renin-angiotensin system. *Circ Res*.  
682 2020, 126(10), 1456-1474. DOI:10.1161/CIRCRESAHA.120.317015  
683
- 684 39. Kuba K, Imai Y, Rao S, Gao H, Guo F, et al. A crucial role of angiotensin converting enzyme  
685 2 (ACE2) in SARS coronavirus-induced lung injury. *Nat Med*. 2005, 11, 875-879.  
686 DOI:10.1038/nm1267.  
687
- 688 40. Chan JFW, Zhang AJ, Yuan S, Poon VKM, Chan CCS. et al. Simulation of the Clinical and  
689 Pathological Manifestations of Coronavirus Disease 2019 (COVID-19) in Golden Syrian  
690 Hamster Model: Implications for Disease Pathogenesis and Transmissibility. *Clin Infect*  
691 *Dis*. 2020, ciaa325. DOI:10.1093/cid/ciaa325.  
692
- 693 41. Gu H, Chen Q, Yang G, He L, Fan H, et al. Adaptation of SARS-CoV-2 in BALB/c mice for  
694 testing vaccine efficacy. *Science*. 2020, 369(6511):1603-1607. DOI:  
695 10.1126/science.abc4730.  
696
- 697 42. Yurkovetskiy L, Wang X, Pascal KE, Tomkins-Tinch C, Nyalile TP, et al. Structural and  
698 Functional Analysis of the D614G SARS-CoV-2 Spike Protein Variant. *Cell*.  
699 2020;183(3):739-751.e8. doi: 10.1016/j.cell.2020.09.032.

700  
701  
702  
703  
704  
705  
706  
707  
708  
709  
710  
711  
712  
713  
714  
715  
716  
717  
718  
719  
720  
721  
722  
723  
724  
725  
726  
727  
728  
729  
730  
731  
732  
733  
734  
735  
736  
737  
738  
739  
740  
741  
742  
743

43. Marchler-Bauer A, Bryant, SH. CD-Search: protein domain annotations on the fly. *Nucleic acids research*. 2004, 32(suppl\_2), W327-W331. DOI:10.1093/nar/gkh454
44. Server, T. M. H. M. M. (2015). v. 2.0. Tmhmm server v2. 0 <http://www.cbs.dtu.dk/services/tmhmm>.
45. Madden, T. The BLAST sequence analysis tool. In *The NCBI Handbook* [Internet]. 2nd edition. National Center for Biotechnology Information (US); 2013.
46. Sievers F, Higgins DG. Clustal Omega, accurate alignment of very large numbers of sequences. In *Multiple sequence alignment methods* (pp. 105-116). Humana Press: Totowa, NJ; 2014.
47. Hammer Ø, Harper DAT, Ryan PD. PAST-palaeontological statistics, ver. 1.89. *Palaeontol. Electron*. 2001, 4(1), 1-9.
48. Pettersen EF, Goddard TD, Huang CC, Couch GS, Greenblatt DM, et al. UCSF Chimera—a visualization system for exploratory research and analysis. *Journal of computational chemistry*. 2004, 25(13), 1605-1612. DOI:10.1002/jcc.20084
49. J Yang, R Yan, A Roy, D Xu, J Poisson, Y Zhang. The I-TASSER Suite: Protein structure and function prediction. *Nature Methods*. 2015, 12, 7-8. DOI:10.1038/nmeth.3213
50. Mashiach E, Schneidman-Duhovny D, Andrusier N, Nussinov R, Wolfson HJ. FireDock: a web server for fast interaction refinement in molecular docking. *Nucleic acids research*. 2008, 36(suppl\_2), W229-W232. DOI:10.1093/nar/gkn186
51. Andrusier N, Nussinov R, Wolfson HJ. FireDock: fast interaction refinement in Molecular docking. *Proteins: Structure, Function, and Bioinformatics*. 2007, 69(1), 139-159. DOI:10.1002/prot.21495
52. Huang X, Zheng W, Pearce R, Zhang Y. SSIPe: accurately estimating protein-protein binding affinity change upon mutations using evolutionary profiles in combination with an optimized physical energy function. *Bioinformatics*. 2020, 36:2429-2437. DOI:10.1093/bioinformatics/btz926
53. Huang X, Pearce R, Zhang Y. EvoEF2: accurate and fast energy function for computational protein design. *Bioinformatics*. 2020, 36, 1135-1142. DOI:10.1038/s41596-020-0312-x
54. Yan Y, Tao H, He J, Huang SY. The HDock server for integrated protein-protein docking. *Nature protocols*. 2020, 15(5), 1829-1852. DOI:10.1093/bioinformatics/btz740

## Figures

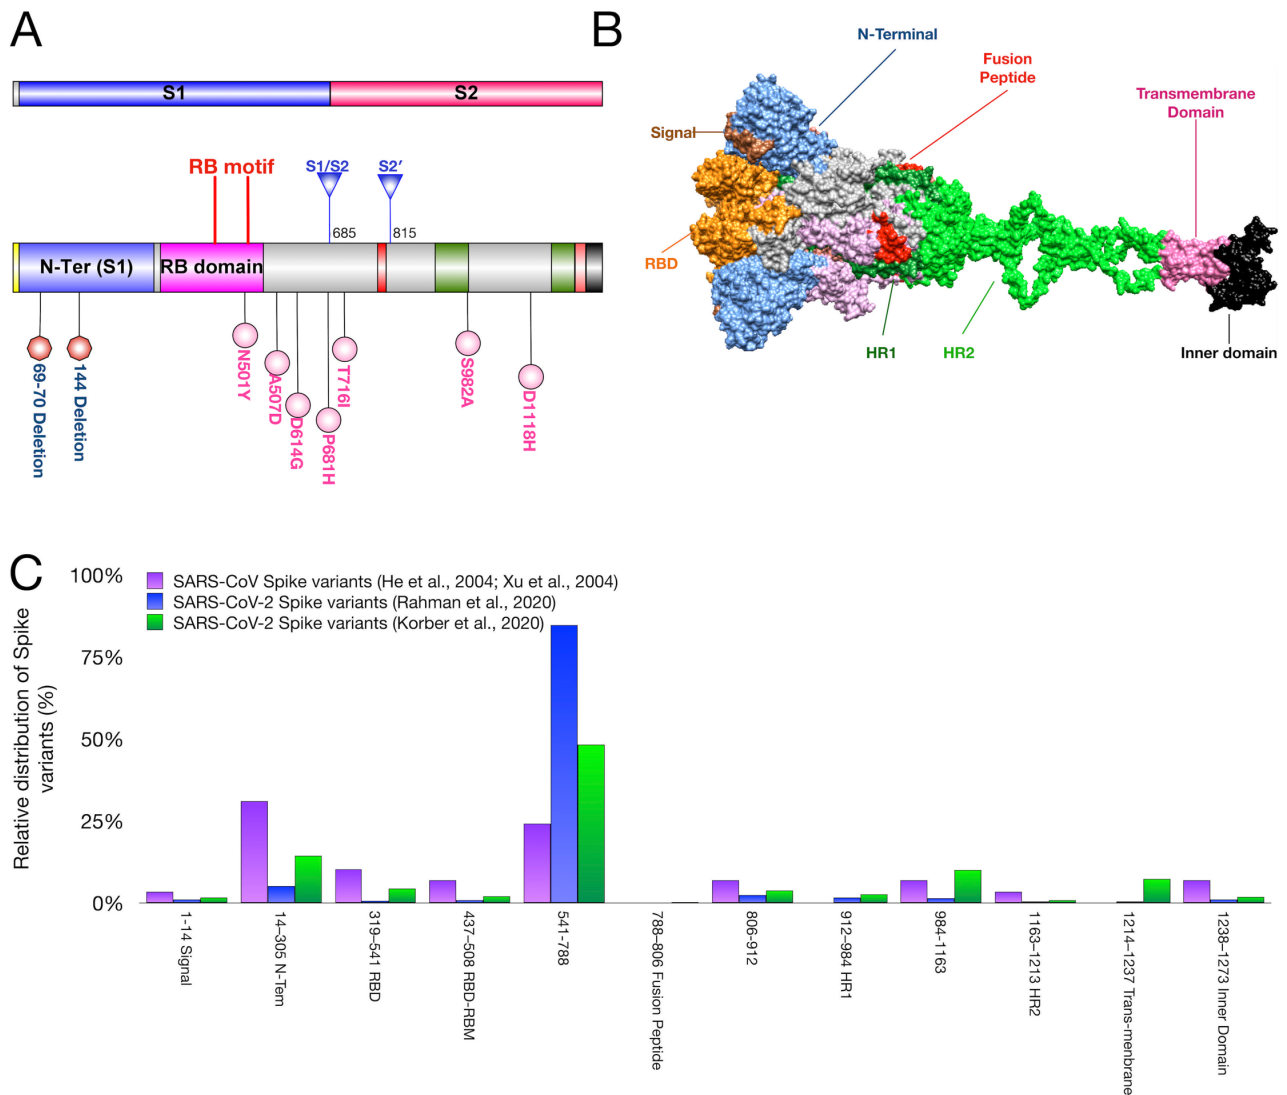

**Fig. 1. SARS-CoV and SARS-CoV-2 Spike protein variants and protein domains. A-B) 2D (A) and 3D (B) maps of SARS-CoV-2 Spike protein domains. Proteolytic cleavage sites (S1/S2, S2') and amino acid variations identified in the B.1.1.7 SARS-CoV-2 variant are shown in the 2D map. C) Relative distribution of SARS-CoV and SARS-CoV-2 Spike amino acid variations with respect to each protein domain as inferred by Dataset S1 (SARS-CoV-2), Dataset S2 (SARS-CoV-2) and Dataset S3 (SARS-CoV). RBD, Receptor Binding Domain; RBM, Receptor Binding Motif; HR1, Heptad Repeat region 1; HR2, Heptad Repeat region 2.**

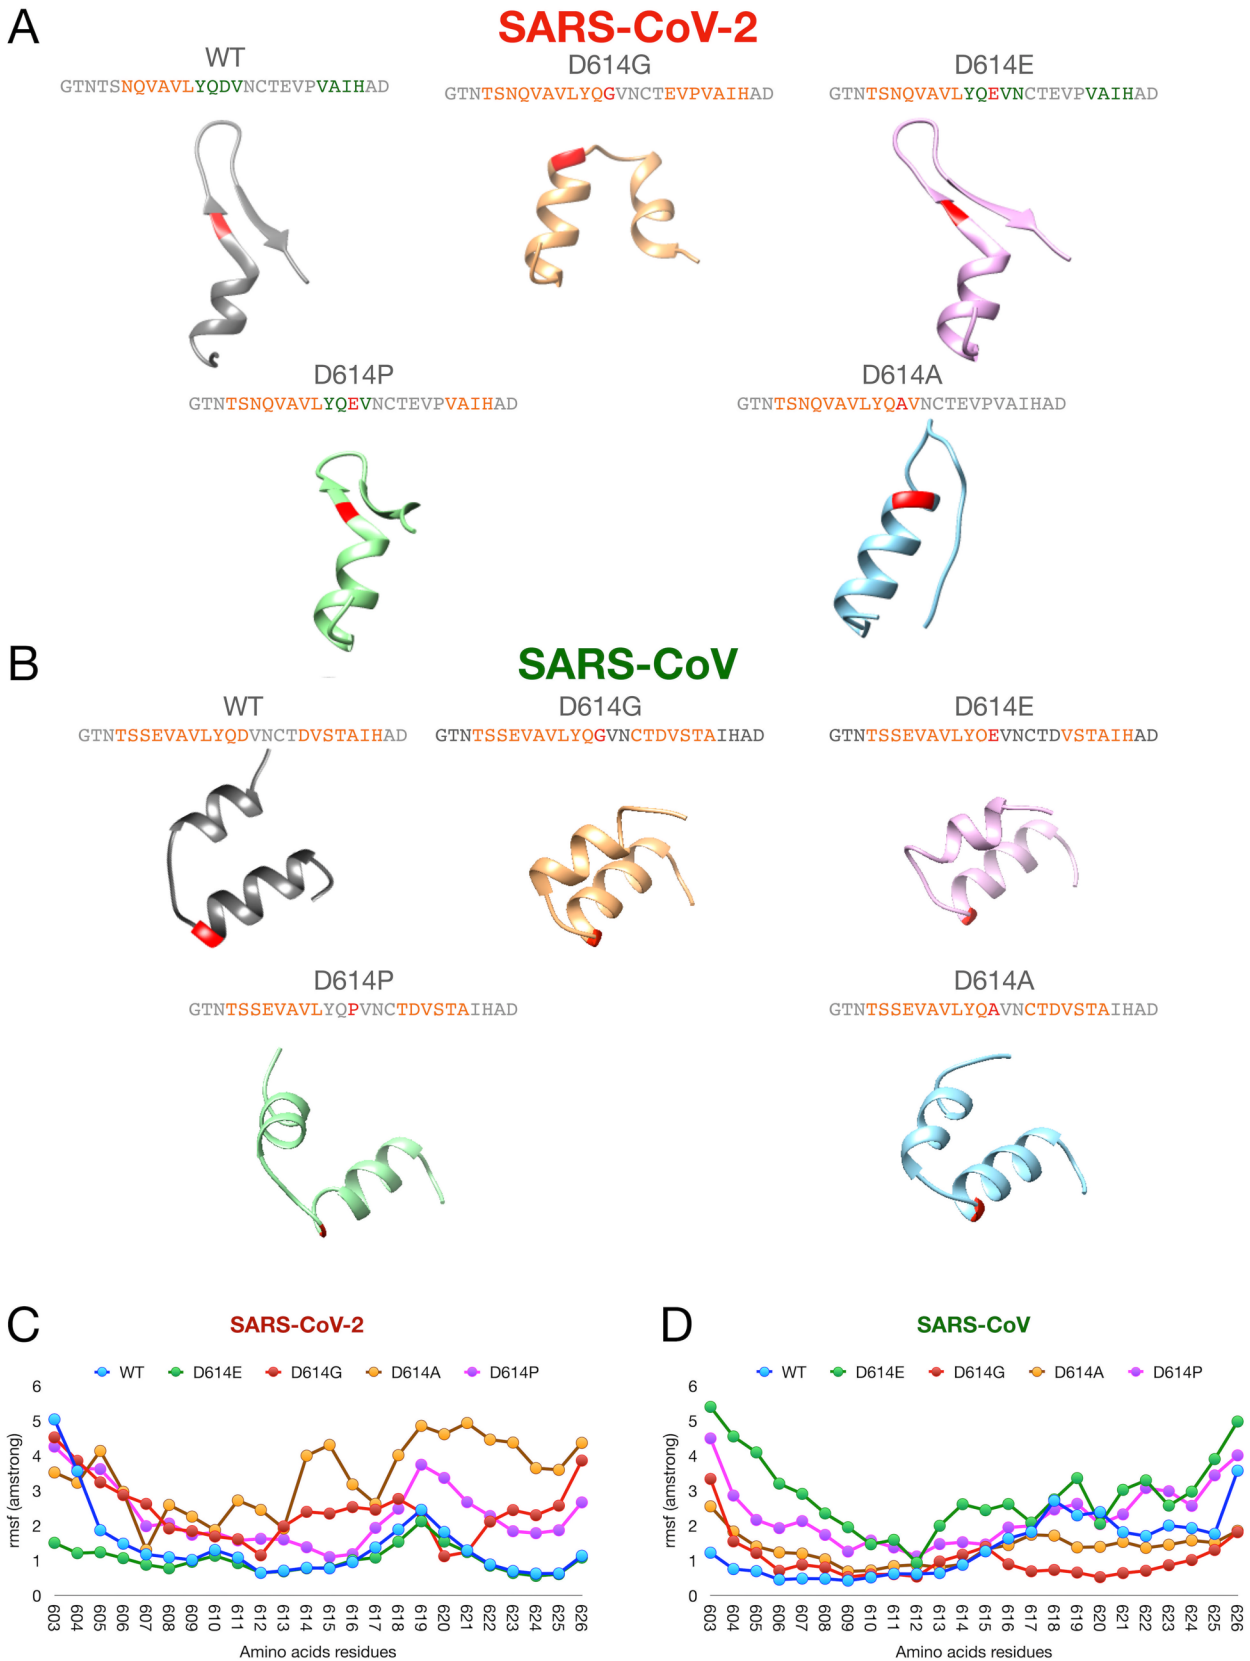

**Fig. 2. Regional secondary structures prediction and domain flexibility of wild type and variants of SARS-CoV and SARS-CoV-2 Spike proteins. (A-B) Secondary structures of the region spanning the amino acids 601-627 of Spike, wild type containing diverse amino acid substitutions in**

position 614: (A) SARS-CoV-2 Spike; (B) SARS-CoV Spike. C) Flexibilities of the regions spanning the amino acids 601-627 of wild type and variants of SARS-CoV Spike (left), and the corresponding region of wild type and variants of SARS-CoV Spike (right) were predicted by CABSflex simulations. RMSF, Route Means Square Fluctuation.

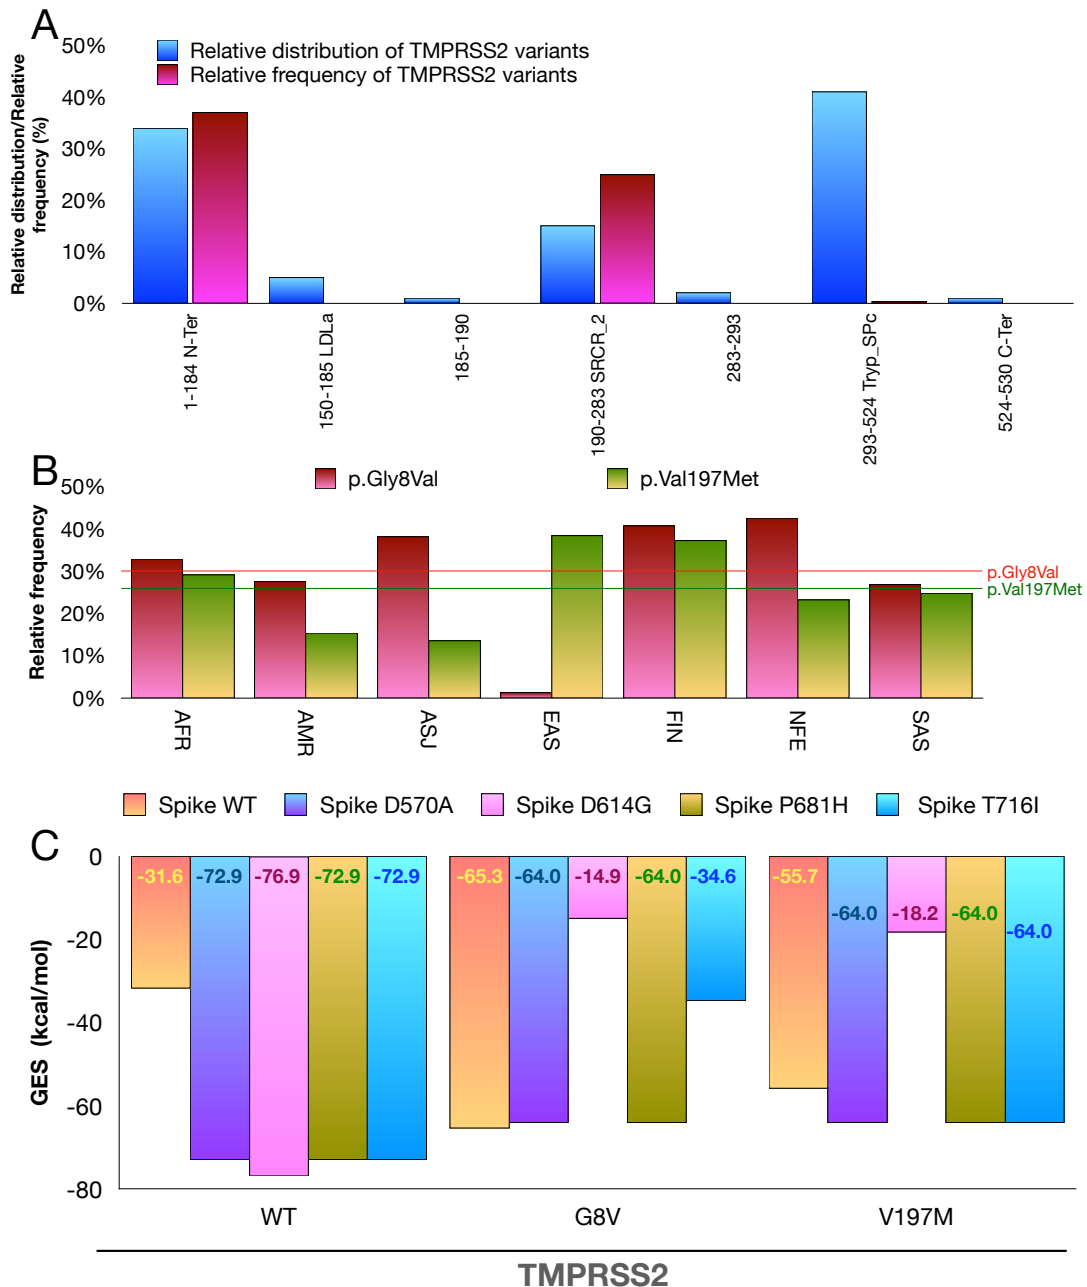

**Fig. 3. TMPRSS2 protein variants and molecular docking simulations of SARS-CoV-2 Spike protein/TMPRSS2 complexes.** A) Relative distribution of TMPRSS2 amino acid variations with respect to each protein domain, and relative frequency worldwide according to GnomAD database.

**B)** Relative frequency of G8V and V197M TMPRSS2 variants in 7 human populations. AFR, African/African-American; AMR, Latino/Admixed American; ASJ, Ashkenazi Jewish; EAS, East Asian; FIN, Finnish; NFE, Non-Finnish European; SAS, South Asian. **C)** Molecular docking simulations of SARS-CoV-2 Spike /TMPRSS2 complexes. Wild type A570D, D614G, P681H, or T716I SARS-CoV-2 Spike was used as a receptor, and wild type, G8V or V197M TMPRSS2 as a ligand. Docking simulations were carried out by Gramm-X server, and FireDock was used to calculate the GES (Global Energy Scores) as detailed in the Materials and Methods.



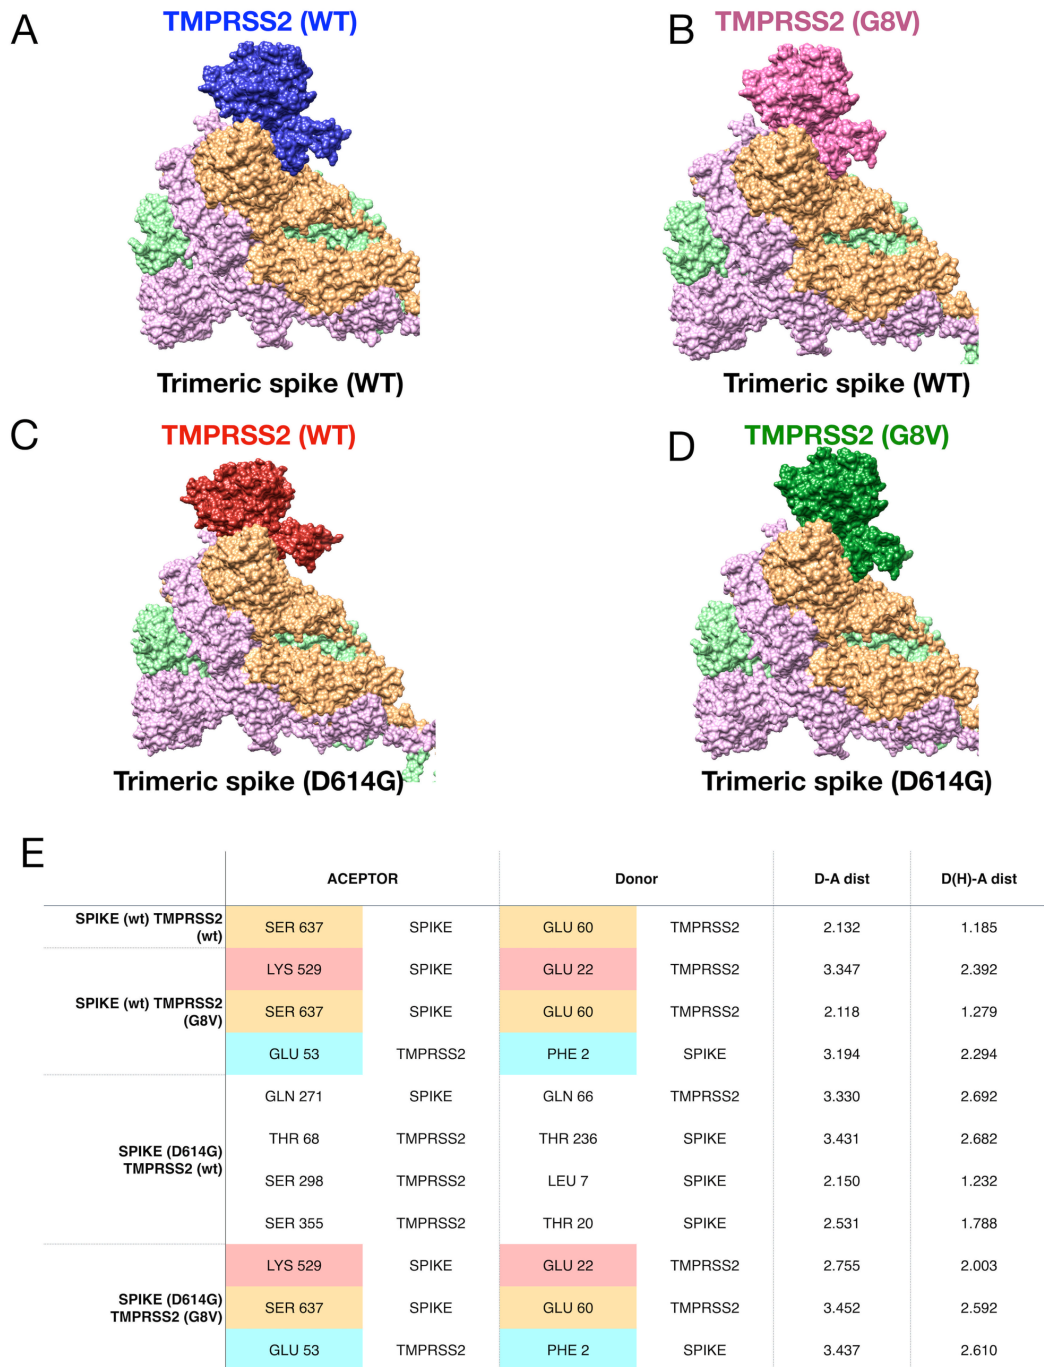

**Fig. 4. Analysis of SARS-CoV-2 Spike protein/TMPRSS2 complexes. A-D)** Molecular docking complexes between wild type or G8V variant of TMPRSS2, and trimeric wild type or D614G variant of SARS-CoV-2 Spike were visualized by using Chimera. **E)** H-bonds analysis results. Amino acid residues providing either donor or acceptor and distances are shown (Å). D-A dist, distance between donor residue and acceptor residue; D(H)-A dist, distance between H of donor and acceptor residues.

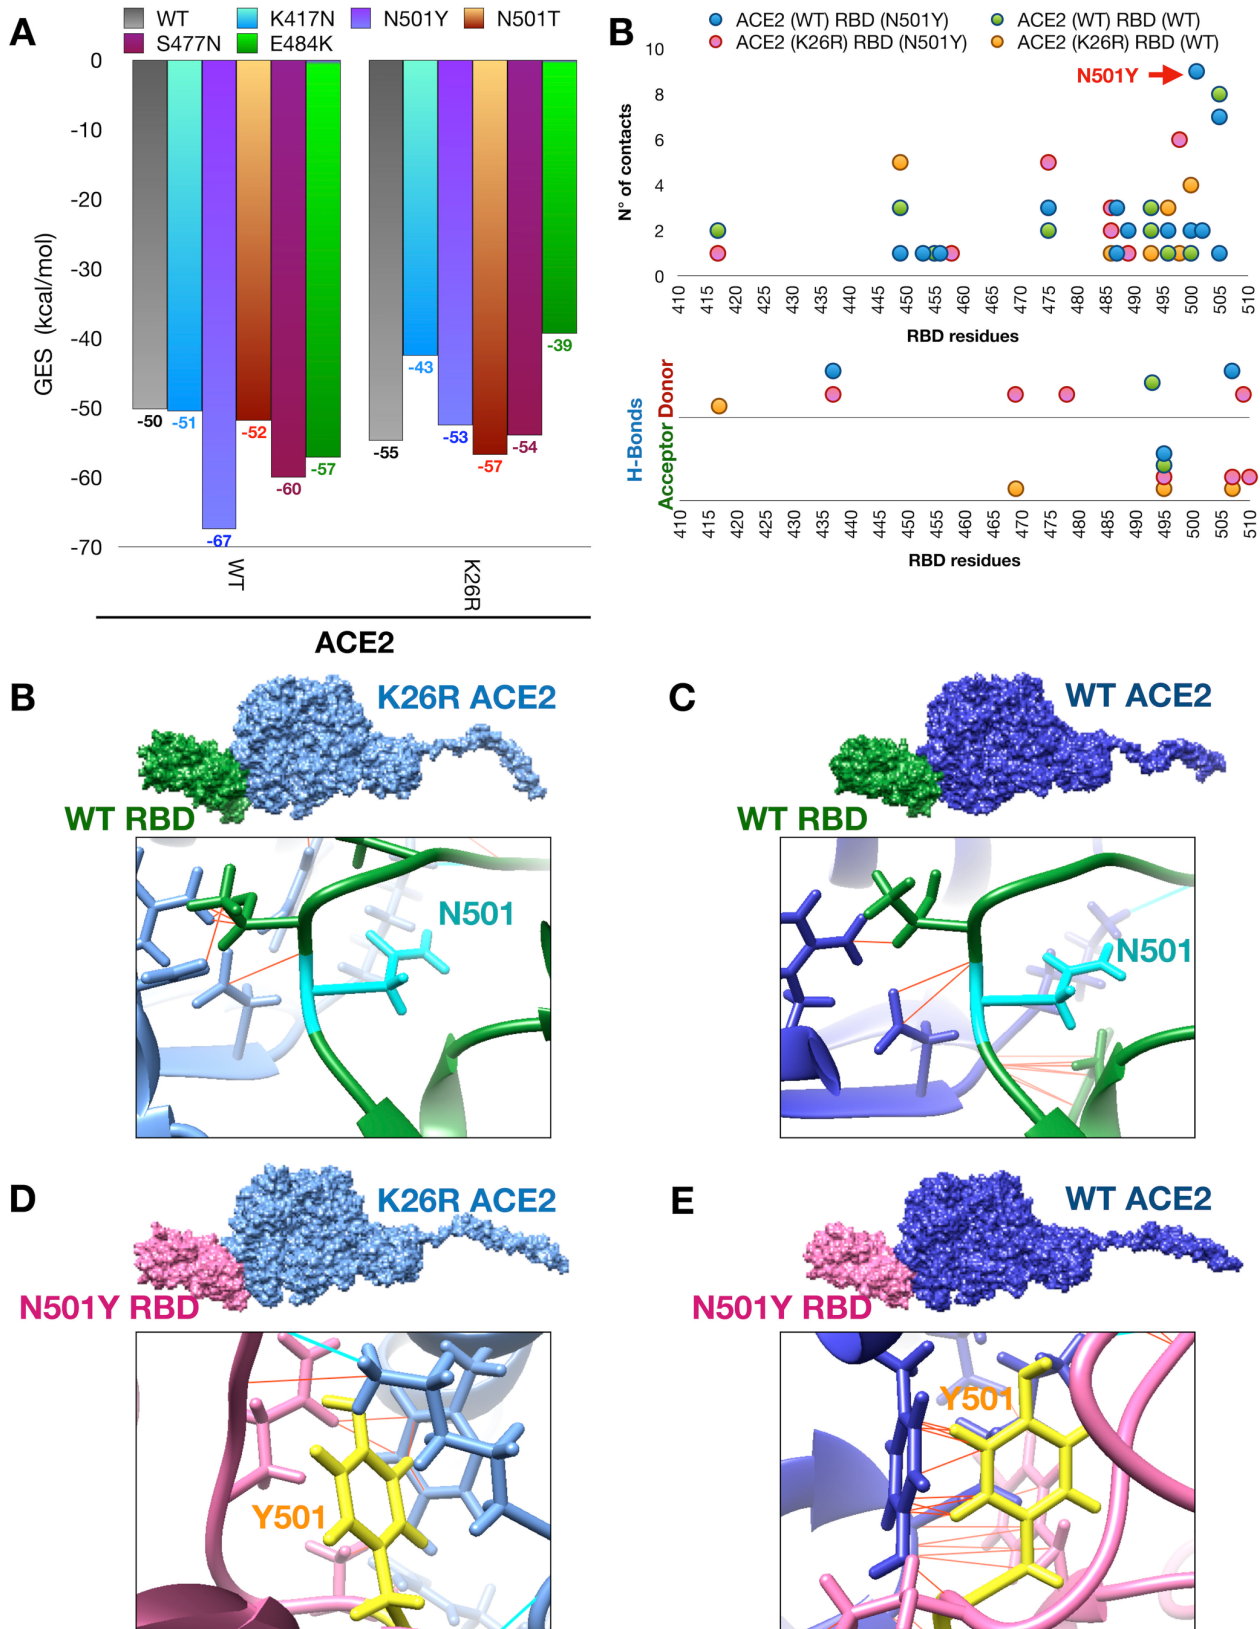

**Fig. 5. Docking complexes between wild type or K26R ACE2 and wild type or mutated SARS-CoV-2 Spike RBD.** A) Computed affinity of molecular docking complexes between wild type wild type or K26R variant of ACE2, and wild type or mutated (N501Y, N501T, K417N, S477N, E484K)

of Spike RBD. **B)** Graphical representation of the identified interaction in SARS-CoV-2 Spike RBD. Up: number of contacts (y-axis) and distribution along the RBD (x-axis). Bottom: position identified H-bonds. **C-F)** Structural analysis of docking complexes as indicated with a focus on the amino acid residue in position 501.

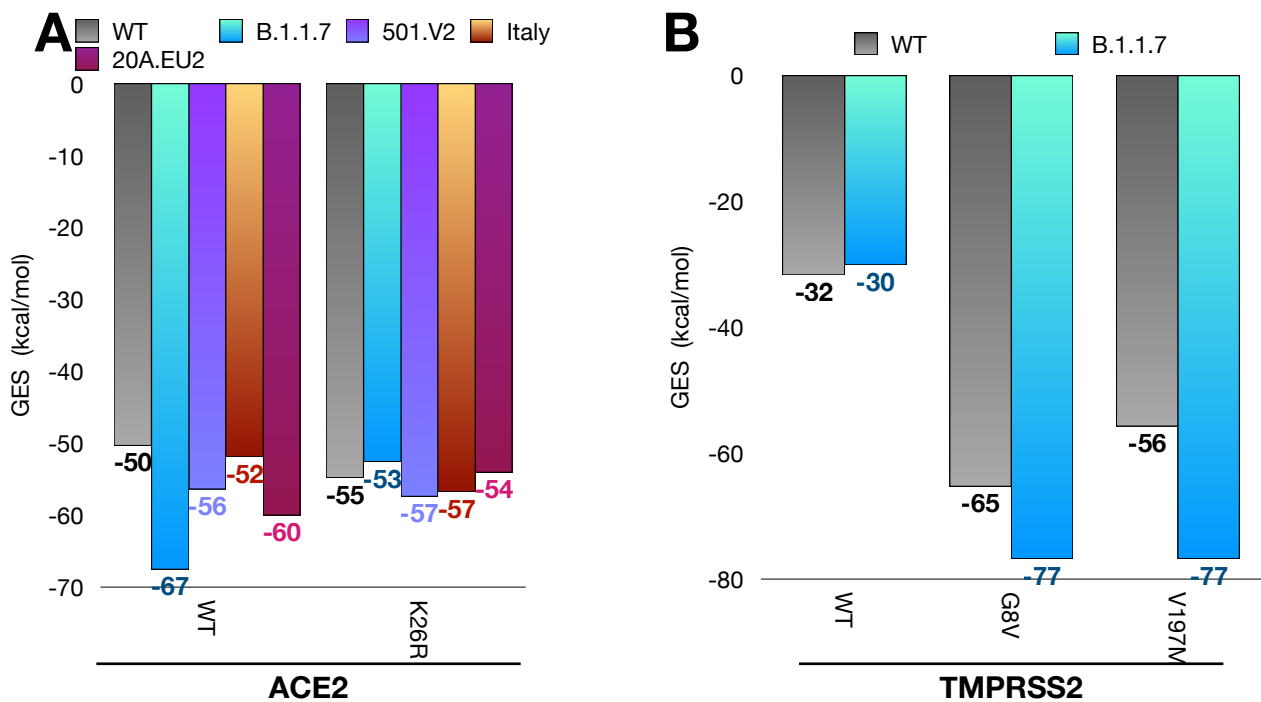

**Fig. 6. Computed affinity of SARS-CoV-2 variants and wild type or polymorphic variants of ACE2 or TMPRSS2. A)** Computed affinity of molecular docking complexes between wild type or K26R variant of ACE2, and wild type Spike or emerging variants of Spike with either single (B.1.1.7; 20A.EU2, Italy) or multiple (501.V2) mutations in RBD. **B)** Computed affinity of molecular docking complexes between wild type, G8V or V197M TMPRSS2 variants and emerging variant of Spike B.1.1.7.

## Supplementary material

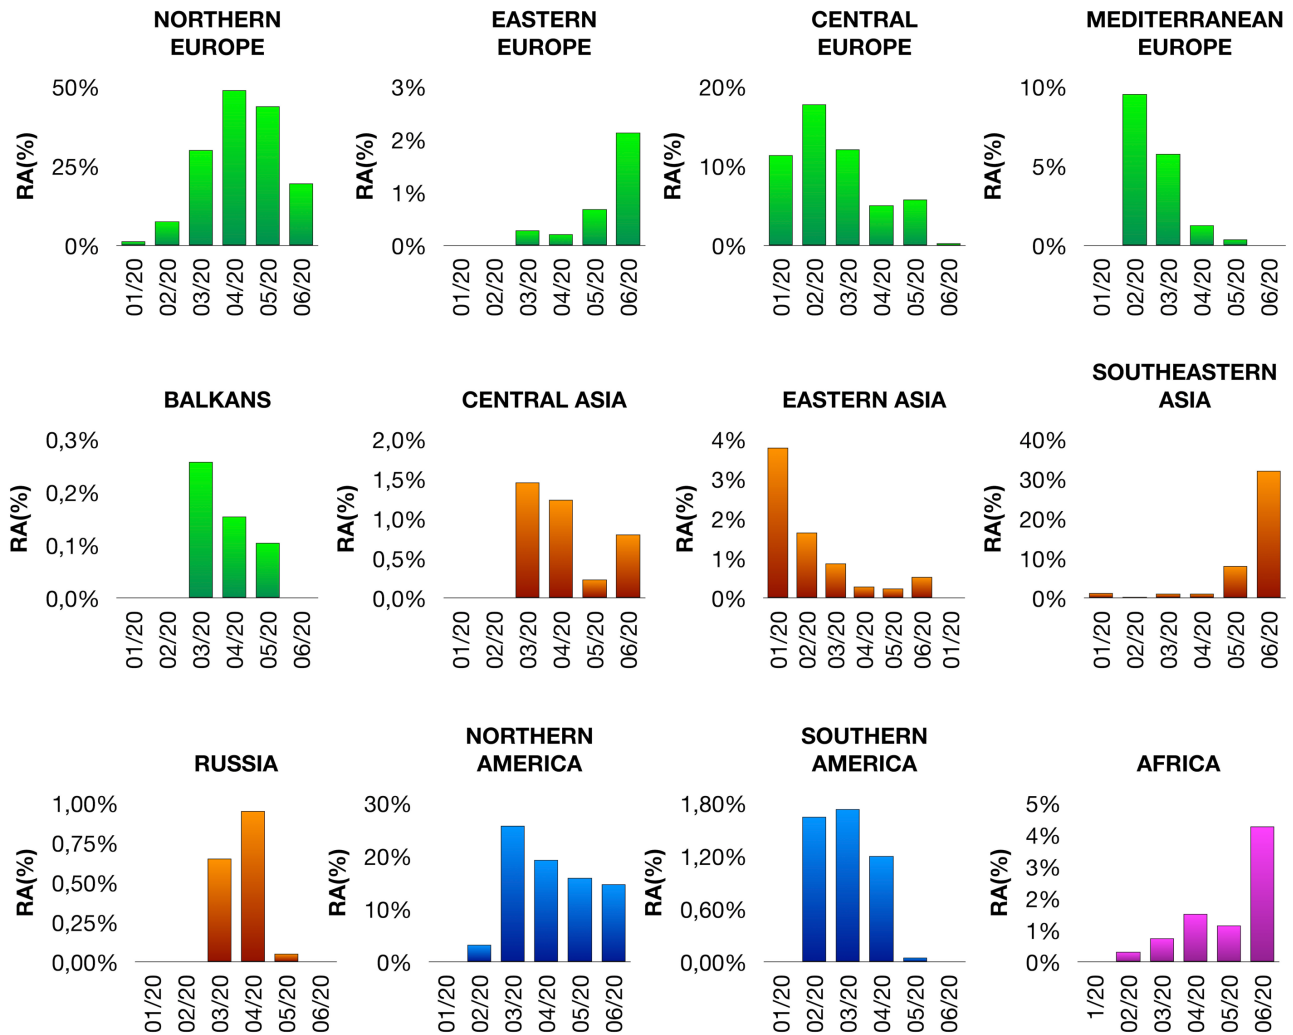

**Fig. S1. Geographical distribution and temporal spread of the SARS-CoV-2 Spike D614G variant.** Geographical distribution and temporal spread of the SARS-CoV-2 Spike D614G variant (time range: 01/2020-06/2020) in 5 regions of Europe (green), 4 regions of Asia (orange), 2 regions of America (blue) and Africa (magenta) are shown. RA, relative abundance.

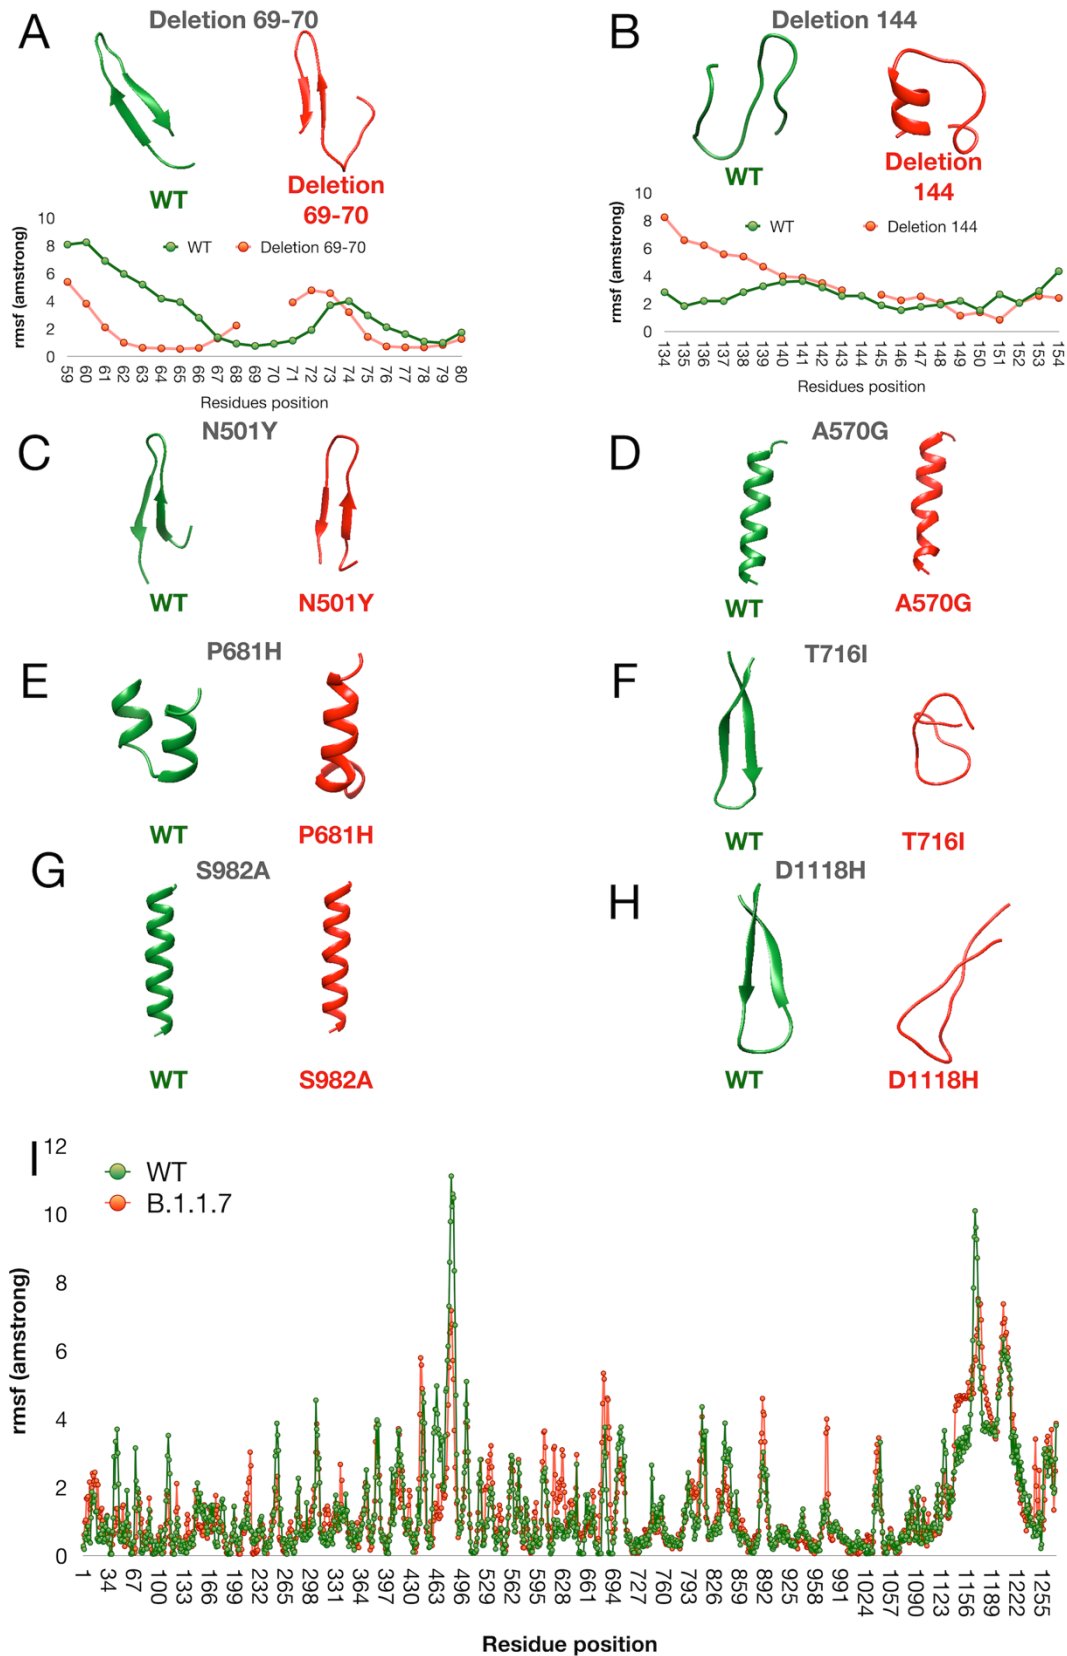

**Fig. S2. Regional secondary structures prediction and domain flexibility of wild type and B.1.1.7 variants of Spike of SARS-CoV-2. A and B) Effects of two N-terminal deletions (69-70**

and 144) on the secondary structure and flexibility. **C-G)** Effects of amino acid substitutions on local secondary structure of Spike. **I)** Comparison of flexibility between wild type and B.1.1.7 Spike.

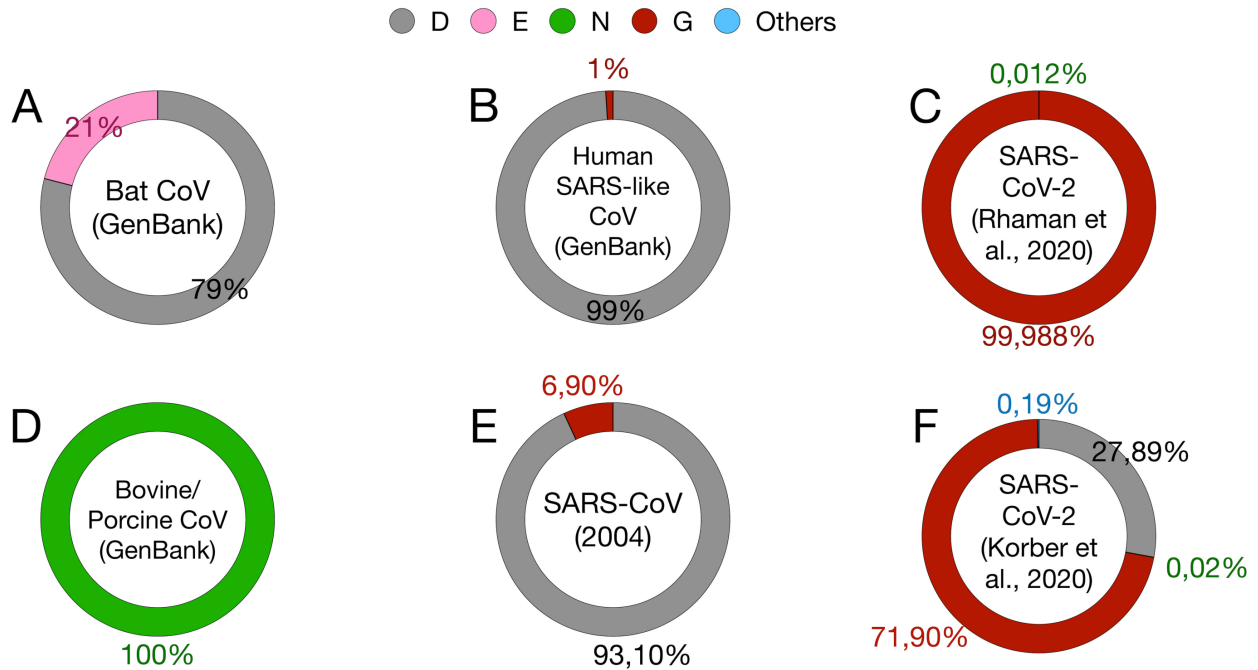

**Fig. S3. Frequencies of the most represented amino acids at the location 614 in SARS-like viruses.** Frequencies reported from the diverse datasets: SARS-CoV-2 (Dataset S1, Dataset S2); SARS-CoV-1 (Dataset S3); SARS-like human virus (Dataset S4); Bat, Avian, Bovine and Porcine Coronavirus (Dataset S4).

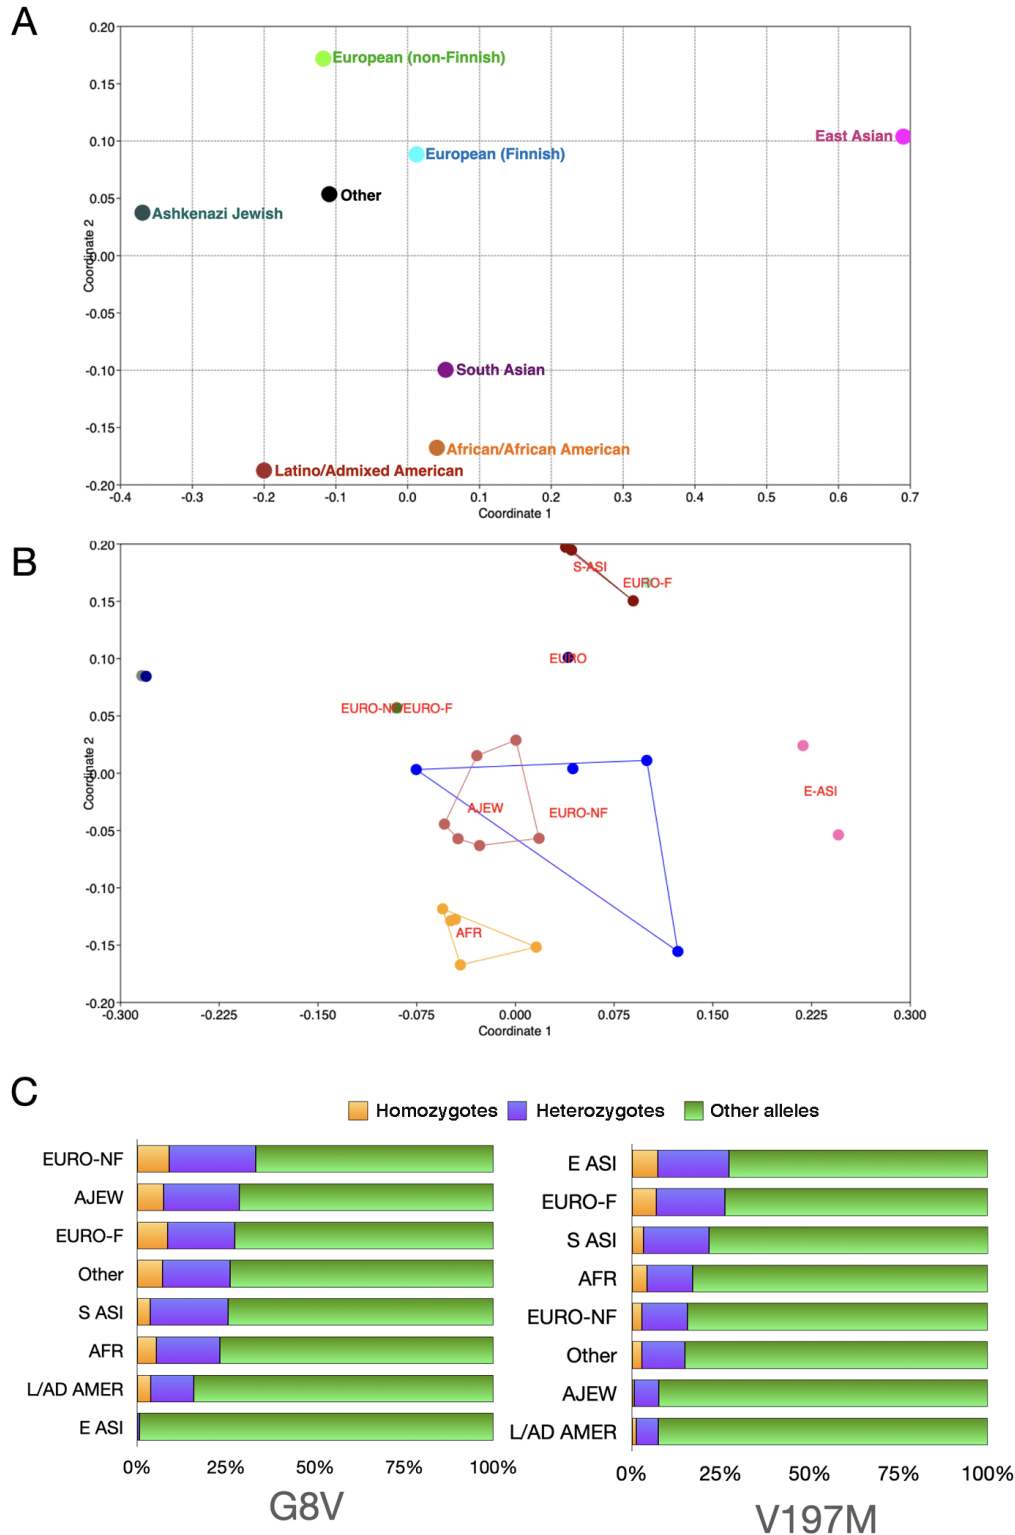

**Fig. S4. Frequencies of TMPRSS2 polymorphisms among human population. A)** Ordination plot (NM-MDS) that compare all TMPRSS2 variants in 7 human populations. **B)** Ordination plot (PCA) distribution of most diffused TMPRSS2 variants (relative frequencies >0.05) in 7 human populations. **C)** Frequencies of two TMPRSS2 variants (G8V and V197M) in homozygous or heterozygous

conditions. Frequencies other alleles were determined as described in materials and Methods. AFR, African/African-American; AMR, Latino/Admixed American; ASJ, Ashkenazi Jewish; EAS, East Asian; FIN, Finnish; NFE, Non-Finnish European; SAS, South Asian.



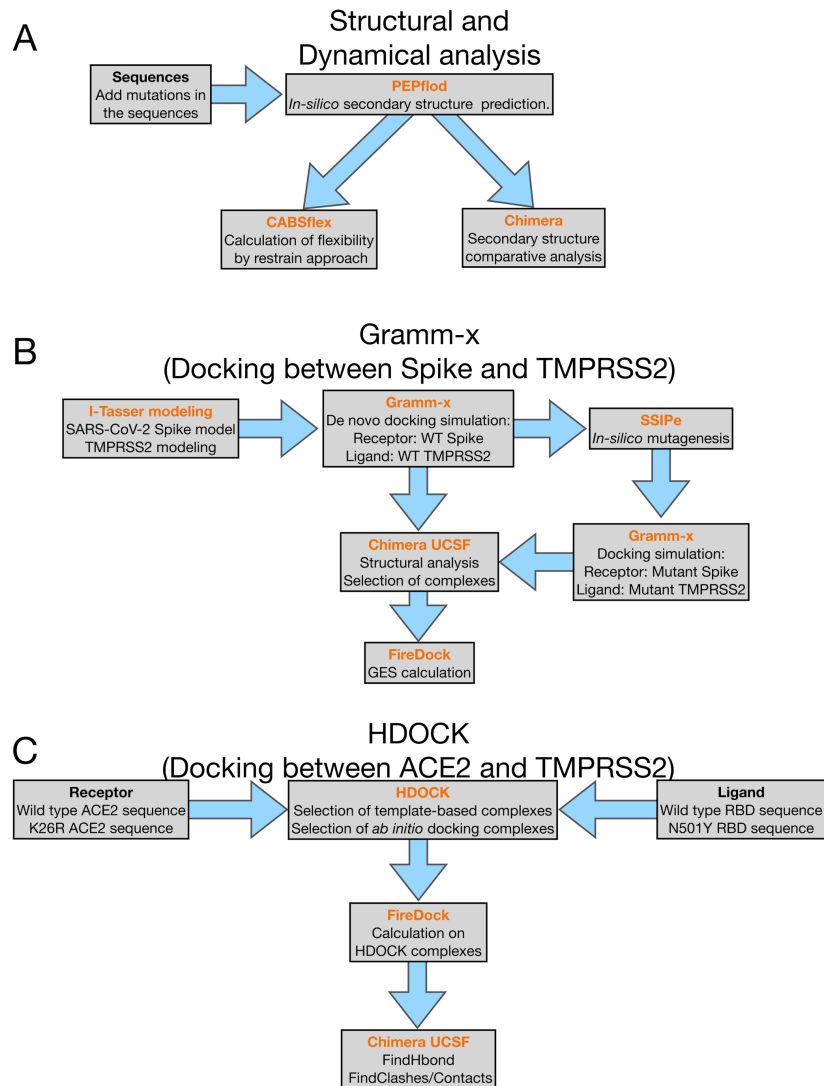

**A) Structural and Dynamical analysis**

1. Starting from the domain 601-627 of SARS-CoV-2 Spike protein and the corresponding region (amino acids 587-613) of SARS-CoV Spike the secondary structure was calculated using ab-initio folding (PEPFold). This calculation was repeated for wild type sequence and for mutated sequences (D614G, D614E, D614A, D614P). An identical approach was used for the domains containing the missenses (N501Y, A570G, P681H, S982A, T916I, D1118H) and the deletion (69-70 and 144).
2. The obtained model was used as input for CABSflex analysis
3. Chimera was used to analyze the secondary structures of the models

**B) Ab-initio Docking (Receptor: Spike models. Ligand: TMPRSS models)**

1. I-Tasser was used to model the wild type TMPRSS2. The models of spike of SARS-CoV-2 were downloaded from <https://zhanglab.ccmh.med.umich.edu/COVID-19/>
2. Gramm-X was used to compute the initial complex between wild type Spike and wild type TMPRSS2.
3. SSiPe server was used to introduce the variations in the models of Spike and TMPRSS
4. Chimera was used to select the complexes that show an interaction between TMPRSS2 and the Spike domain of cleavage sites.
5. FireDock was used to calculate the GES (global energy score, Kcal/mol)

**C) Ab-initio Docking (Receptor: ACE2 models. Ligand: SpikeRBD)**

1. The sequences of wild type ACE2 and of K26R ACE2 were used as receptors in HDOCK simulation, while wild type RBD and N501Y RBD were used as ligands.
2. FireDock was used to calculate the GES (global energy score, Kcal/mol)
3. Chimera was used to identify H-bonds and Contact

**Fig. S5. Computational workflow used in this study. A)** Structural and dynamical analysis performed on 601-627 domain of SARS-CoV-2 Spike protein and the corresponding region (587-613) of SARS-CoV Spike. This analysis was repeated for 4 missenses (D614G, D614E, D614A,

D614P). An identical approach was used for the domains containing the missenses (N501Y, A570G, P681H, S982A, T916I, D1118H) and the deletions (69-70 and 144). **B)** Ab-initio docking was used to characterize the interaction between WT or variant Spike proteins and WT or variant TMPRSS2. **C)** Template base docking used to compute the effect of RBD N501Y missense on the interaction with WT or K26R ACE2.

## Supplementary Datasets

**Dataset S1.** The Dataset reports the missense mutations identified in the SARS-CoV-2 Spike proteins described by Rahman et al. [24]. **Table 1.** Counts and frequencies of identified missense mutations. **Table 2.** Temporal distribution of missense mutations. **Table 3.** Geographical distribution of missense mutations. **Table 4:** Countries included in the geographical region. **Table 5.** Distribution of the amino acid variations in the Spike domain.

**Dataset S2.** The Dataset reports the frequencies of the missense mutations identified in the SARS-CoV-2 Spike proteins described by Kromer et al. [25].

**Dataset S3.** The Dataset reports the missense mutations identified in two studies on SARS-CoV in the year 2004 [26,27]. **Table 1.** Counts and frequencies of identified missense mutations. **Table 5.** Distribution of the amino acid variations in the Spike domain.

**Dataset S4.** The Dataset was implemented using BLAST, restricting the search to: i) the SARS-CoV-2 sequences, SARS-Like human virus, Bat SARS-Like virus and porcine/bovine SARS-like virus. Ref sequences of SARS-CoV-2 was used as query.
